# Supplementary material for: Application of Suzuki arylation, Sonogashira ethynylation and Rosenmund–von Braun cyanation in the exploration of substitution effects on the anticancer activity of 2-aroylquinolines
Source: Royal Society of Chemistry journal article supplement (doi:10.1039/c2ob26614h), 2012-01-01

**Electronic Supplementary Information**

**Application of Suzuki Arylation, Sonogashira Ethynylation, and Rosenmund-von Braun Cyanation in the Exploration of Substitution Effect on Anticancer Activity of 2-Aroylquinolines.**

Hsueh-Yun Lee,<sup>a</sup> Lin-Wen Lee,<sup>d</sup> Chih-Ying Nien,<sup>a</sup> Ching-Chuan Kuo,<sup>b</sup> Pen-Yuan Lin,<sup>a</sup> Chi-Yen Chang,<sup>b</sup> Jang-Yang Chang\*<sup>b,c</sup> and Jing-Ping Liou\*<sup>a</sup>

<sup>a</sup> School of Pharmacy, College of Pharmacy, Taipei Medical University, 250 Wuxing Street, Taipei 11031 (Taiwan, Republic of China)

<sup>b</sup> National Institute of Cancer Research, National Health Research Institutes, Tainan 704 (Taiwan, Republic of China)

<sup>c</sup> Division of Hematology/Oncology, Department of Internal Medicine, National Cheng Kung University Hospital, Tainan 704 (Taiwan, Republic of China)

<sup>d</sup> Department of Microbiology and Immunology, Taipei Medical University (Taiwan, Republic of China)

**Contents:**

|                                                             |        |
|-------------------------------------------------------------|--------|
| HPLC purity data for compounds <b>6-16</b> .....            | ESI 2  |
| HRMS data for compounds <b>6-16</b> .....                   | ESI 3  |
| <sup>1</sup> H-NMR Spectra for compounds <b>6-16</b> .....  | ESI 6  |
| <sup>13</sup> C-NMR Spectra for compounds <b>6-16</b> ..... | ESI 17 |
| IR Spectra for compounds <b>6</b> and <b>7</b> .....        | ESI 28 |

**HPLC purity determination:**

The percentage purity of compounds were determined by an Agilent 1100 series HPLC system using C18 column.

Elution conditions: Mobile phase A-Acetonitrile; Mobile phase B-Water containing 0.1% formic acid + 10 mmol NH<sub>4</sub>OAc. The flow-rate was 0.2 ml/min and the injection volume was 5 µl. The system operated at 25 °C. Peaks were detected at 210 nm.

**Table 1.** Elution condition

| Time (min) | Mobile Phase A (ratio) | Mobile Phase B (ratio) |
|------------|------------------------|------------------------|
| 0          | 10                     | 90                     |
| 45         | 90                     | 10                     |
| 50         | 10                     | 90                     |
| 60         | 10                     | 90                     |

**Table 2.** Purity of compounds **6-12**

C18 column: Agilent ZORBAX Eclipse XDB-C18 5µm. 4.6 mm × 150 mm column

| Compounds | Retention time (min) | % Purity |
|-----------|----------------------|----------|
| <b>6</b>  | 34.94                | 99.82    |
| <b>7</b>  | 36.37                | 100.00   |
| <b>8</b>  | 21.43                | 95.42    |
| <b>9</b>  | 33.16                | 99.87    |
| <b>10</b> | 30.61                | 100.00   |
| <b>11</b> | 33.77                | 92.67    |
| <b>12</b> | 43.40                | 98.50    |
| <b>13</b> | 39.96                | 98.72    |
| <b>14</b> | 44.51                | 100.00   |
| <b>15</b> | 45.18                | 99.85    |
| <b>16</b> | 42.80                | 100.00   |

### HRMS data for compound 6

[ Elemental Composition ]

Data : 200906649 Date : 15-Oct-2009 10:58  
Sample: 8-723  
Note : -  
Inlet : Direct Ion Mode : EI+  
RT : 0.74 min Scan#: 33  
Elements : C 21/0, H 19/0, O 6/0, N 2/0, S 1/0  
Mass Tolerance : 1000ppm, 3mmu if m/z < 3, 5mmu if m/z > 5  
Unsaturation (U.S.) : -0.5 - 30.0

Page: 1

| Observed m/z | Int%  | Err[ppm / mmu] | U.S. | Composition       |
|--------------|-------|----------------|------|-------------------|
| 378.1216     | 100.0 | +0.0 / +0.0    | 14.0 | C 21 H 18 O 5 N 2 |

### HRMS data for compound 7

[ Elemental Composition ]

Data : 201010173 Date : 24-Aug-2010 17:09  
Sample: 8-996-2  
Note : -  
Inlet : Direct Ion Mode : EI+  
RT : 1.62 min Scan#: 66  
Elements : C 23/0, H 22/0, O 7/0, N 1/0  
Mass Tolerance : 1000ppm, 3mmu if m/z < 3, 5mmu if m/z > 5  
Unsaturation (U.S.) : -1.0 - 25.0

Page: 1

| Observed m/z | Int% | Err[ppm / mmu] | U.S. | Composition     |
|--------------|------|----------------|------|-----------------|
| 377.1263     | 16.3 | -0.2 / -0.1    | 14.0 | C 22 H 19 O 5 N |

### HRMS data for compound 8

[ Elemental Composition ]

Data : 201010165 Date : 21-Aug-2010 20:38  
Sample: 8-983  
Note : -  
Inlet : Direct Ion Mode : EI+  
RT : 0.21 min Scan#: 12  
Elements : C 21/0, H 34/0, O 6/0, N 3/0  
Mass Tolerance : 1000ppm, 3mmu if m/z < 3, 5mmu if m/z > 5  
Unsaturation (U.S.) : -1.0 - 25.0

Page: 1

| Observed m/z | Int% | Err[ppm / mmu] | U.S. | Composition       |
|--------------|------|----------------|------|-------------------|
| 396.1323     | 62.9 | +0.3 / +0.1    | 13.0 | C 21 H 20 O 6 N 2 |

### HRMS data for compound 9

[ Elemental Composition ]

Data : 200906581 Date : 25-Sep-2009 17:27  
Sample: 8-823  
Note : -  
Inlet : Direct Ion Mode : EI+  
RT : 0.79 min Scan#: 38  
Elements : C 26/0, H 25/0, O 6/0, N 2/0, I 1/0  
Mass Tolerance : 1000ppm, 3mmu if m/z < 3, 5mmu if m/z > 5  
Unsaturation (U.S.) : -0.5 - 30.0

Page: 1

| Observed m/z | Int%  | Err[ppm / mmu] | U.S. | Composition     |
|--------------|-------|----------------|------|-----------------|
| 435.1681     | 100.0 | -0.2 / -0.1    | 14.0 | C 25 H 25 O 6 N |

### HRMS data for compound 10

[ Theoretical Ion Distribution ] Page: 1  
Molecular Formula : C<sub>25</sub> H<sub>22</sub> O<sub>5</sub> N<sub>2</sub>  
(m/z 430.1529, MW 430.4601, U.S. 16.0)  
Base Peak : 430.1529, Averaged MW : 430.4614(a), 430.4621(w)

| m/z      | INT.     |       |
|----------|----------|-------|
| 430.1529 | 100.0000 | ***** |
| 431.1561 | 29.0611  | ***** |
| 432.1589 | 5.0691   | ***   |
| 433.1616 | 0.6558   |       |
| 434.1642 | 0.0682   |       |
| 435.1668 | 0.0060   |       |
| 436.1694 | 0.0005   |       |

### HRMS data for compound 11

[ Elemental Composition ] Page: 1  
Data : 200906578 Date : 25-Sep-2009 17:11  
Sample: 8-863  
Note : -  
Inlet : Direct Ion Mode : EI+  
RT : 0.73 min Scan#: 35  
Elements : C 26/0, H 24/0, O 6/0, N 1/0, I 1/0  
Mass Tolerance : 1000ppm, 3mmu if m/z < 3, 5mmu if m/z > 5  
Unsaturation (U.S.) : -0.5 - 30.0

| Observed m/z | Int% | Err[ppm / mmu] | U.S. Composition     |
|--------------|------|----------------|----------------------|
| 445.1526     | 22.0 | +0.2 / +0.1    | 16.0 C 26 H 23 O 6 N |

### HRMS data for compound 12

[ Elemental Composition ] Page: 1  
Data : 201010168 Date : 24-Aug-2010 16:07  
Sample: 8-1024  
Note : -  
Inlet : Direct Ion Mode : EI+  
RT : 0.23 min Scan#: 12  
Elements : C 27/0, H 25/0, O 7/0, N 3/0  
Mass Tolerance : 1000ppm, 3mmu if m/z < 3, 5mmu if m/z > 5  
Unsaturation (U.S.) : -1.0 - 25.0

| Observed m/z | Int% | Err[ppm / mmu] | U.S. Composition     |
|--------------|------|----------------|----------------------|
| 459.1681     | 82.1 | -0.3 / -0.1    | 16.0 C 27 H 25 O 6 N |

### HRMS data for compound 13

[ Elemental Composition ] Page: 1  
Data : 201010171 Date : 24-Aug-2010 16:33  
Sample: 8-1035  
Note : -  
Inlet : Direct Ion Mode : EI+  
RT : 0.79 min Scan#: 44  
Elements : C 27/0, H 22/0, O 7/0, N 3/0  
Mass Tolerance : 1000ppm, 3mmu if m/z < 3, 5mmu if m/z > 5  
Unsaturation (U.S.) : -1.0 - 25.0

| Observed m/z | Int% | Err[ppm / mmu] | U.S. Composition       |
|--------------|------|----------------|------------------------|
| 454.1527     | 4.4  | -0.4 / -0.2    | 18.0 C 27 H 22 O 5 N 2 |

### HRMS data for compound 14

Page: 1

[ Elemental Composition ]  
Data : 201010169 Date : 24-Aug-2010 16:12  
Sample: 8-1034  
Note : -  
Inlet : Direct Ion Mode : EI+  
RT : 1.12 min Scan#: 62  
Elements : C 26/0, H 22/0, O 5/0, N 3/0, F 1/0  
Mass Tolerance : 1000ppm, 3mmu if m/z < 3, 5mmu if m/z > 5  
Unsaturation (U.S.) : -1.0 - 25.0

| Observed m/z | Int%  | Err [ppm / mmu] | U.S. | Composition       |
|--------------|-------|-----------------|------|-------------------|
| 447.1484     | 100.0 | +0.5 / +0.2     | 16.0 | C 26 H 22 O 5 N F |

### HRMS data for compound 15

Page: 1

[ Elemental Composition ]  
Data : 201010166 Date : 24-Aug-2010 15:44  
Sample: 8-1006  
Note : -  
Inlet : Direct Ion Mode : EI+  
RT : 0.99 min Scan#: 50  
Elements : C 26/0, H 21/0, O 6/0, N 1/0, F 3/0  
Mass Tolerance : 1000ppm, 3mmu if m/z < 3, 5mmu if m/z > 5  
Unsaturation (U.S.) : -1.0 - 25.0

| Observed m/z | Int% | Err [ppm / mmu] | U.S. | Composition         |
|--------------|------|-----------------|------|---------------------|
| 465.1390     | 60.0 | +0.4 / +0.2     | 16.0 | C 26 H 21 O 5 N F 2 |

### HRMS data for compound 16

Page: 1

[ Elemental Composition ]  
Data : 201010167 Date : 24-Aug-2010 15:59  
Sample: 8-1022  
Note : -  
Inlet : Direct Ion Mode : EI+  
RT : 0.32 min Scan#: 17  
Elements : C 26/0, H 22/0, O 7/0, N 3/0  
Mass Tolerance : 1000ppm, 3mmu if m/z < 3, 5mmu if m/z > 5  
Unsaturation (U.S.) : -1.0 - 25.0

| Observed m/z | Int%  | Err [ppm / mmu] | U.S. | Composition       |
|--------------|-------|-----------------|------|-------------------|
| 474.1426     | 100.0 | -0.3 / -0.1     | 17.0 | C 26 H 22 O 7 N 2 |

### <sup>1</sup>H Spectra for compound 6

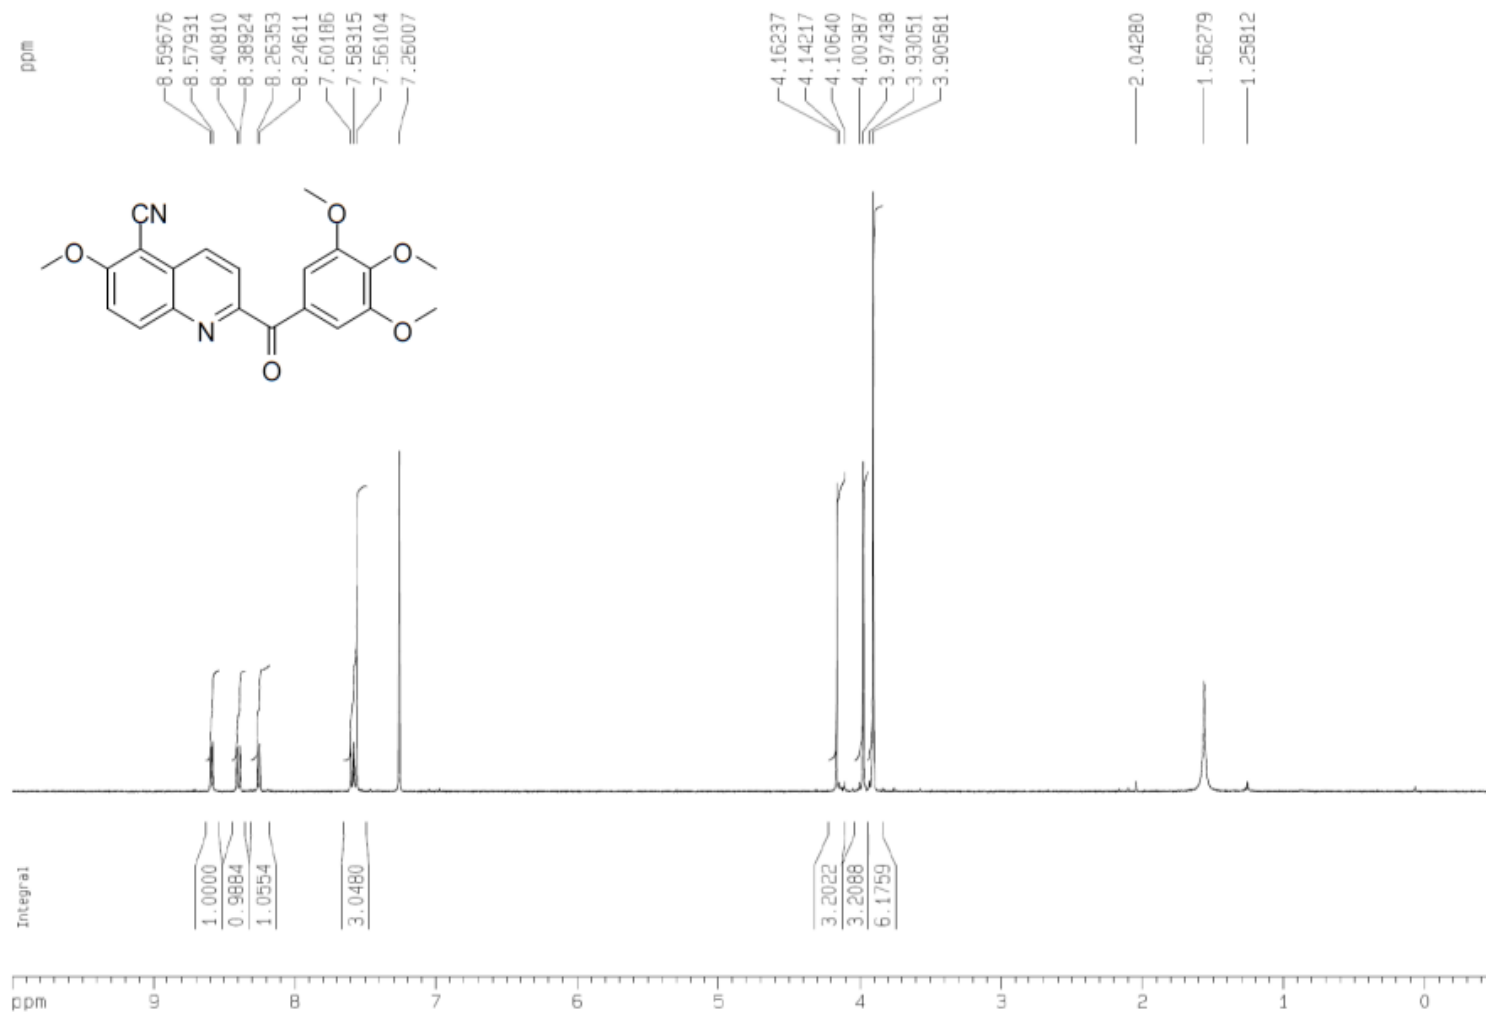

Current Data Parameters  
NAME 0305-8723  
EXPNO 1  
PROCNO 1

F2 - Acquisition Parameters  
Date\_ 20090305  
Time 15.41  
INSTRUM spect  
PROBHD 5 mm TXI 13C Z  
PULPROG zg30  
TD 32768  
SOLVENT CDCl3  
NS 16  
DS 2  
SWH 10000.000 Hz  
FIDRES 0.305176 Hz  
AQ 1.6384500 sec  
RG 5792.6  
DW 50.000 usec  
DE 6.50 usec  
TE 300.1 K  
D1 1.00000000 sec  
MCREST 0.00000000 sec  
MCWRK 0.01500000 sec

===== CHANNEL f1 =====  
NUC1 1H  
P1 10.70 usec  
PL1 -2.00 dB  
SF01 500.1330685 MHz

F2 - Processing parameters  
SI 16384  
SF 500.1300136 MHz  
WDW EM  
SSB 0  
LB 0.30 Hz  
GB 0  
PC 1.40

1D NMR plot parameters  
CX 22.00 cm  
CY 10.00 cm  
F1P 10.000 ppm  
F1 5001.30 Hz  
F2P -0.500 ppm  
F2 -250.06 Hz  
PPMCM 0.47727 ppm/cm  
HZCM 238.59839 Hz/cm

<sup>1</sup>H Spectra for compound 7

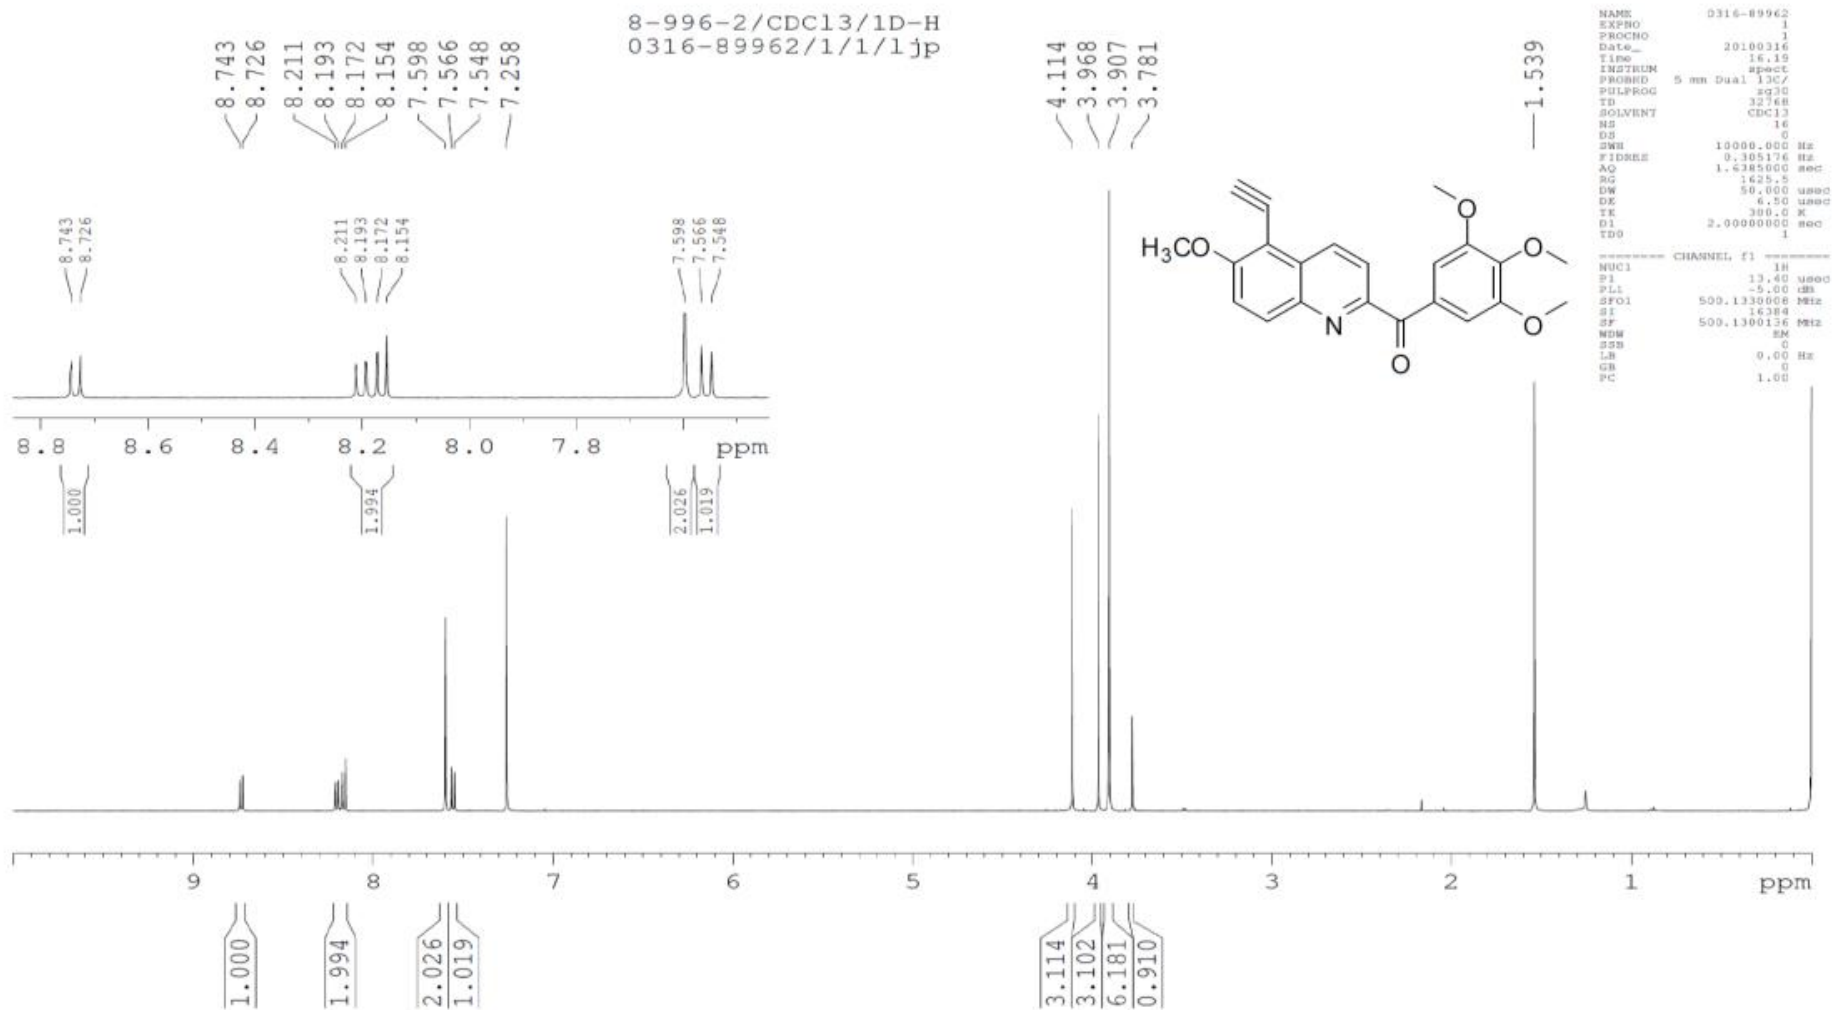

<sup>1</sup>H Spectra for compound 8

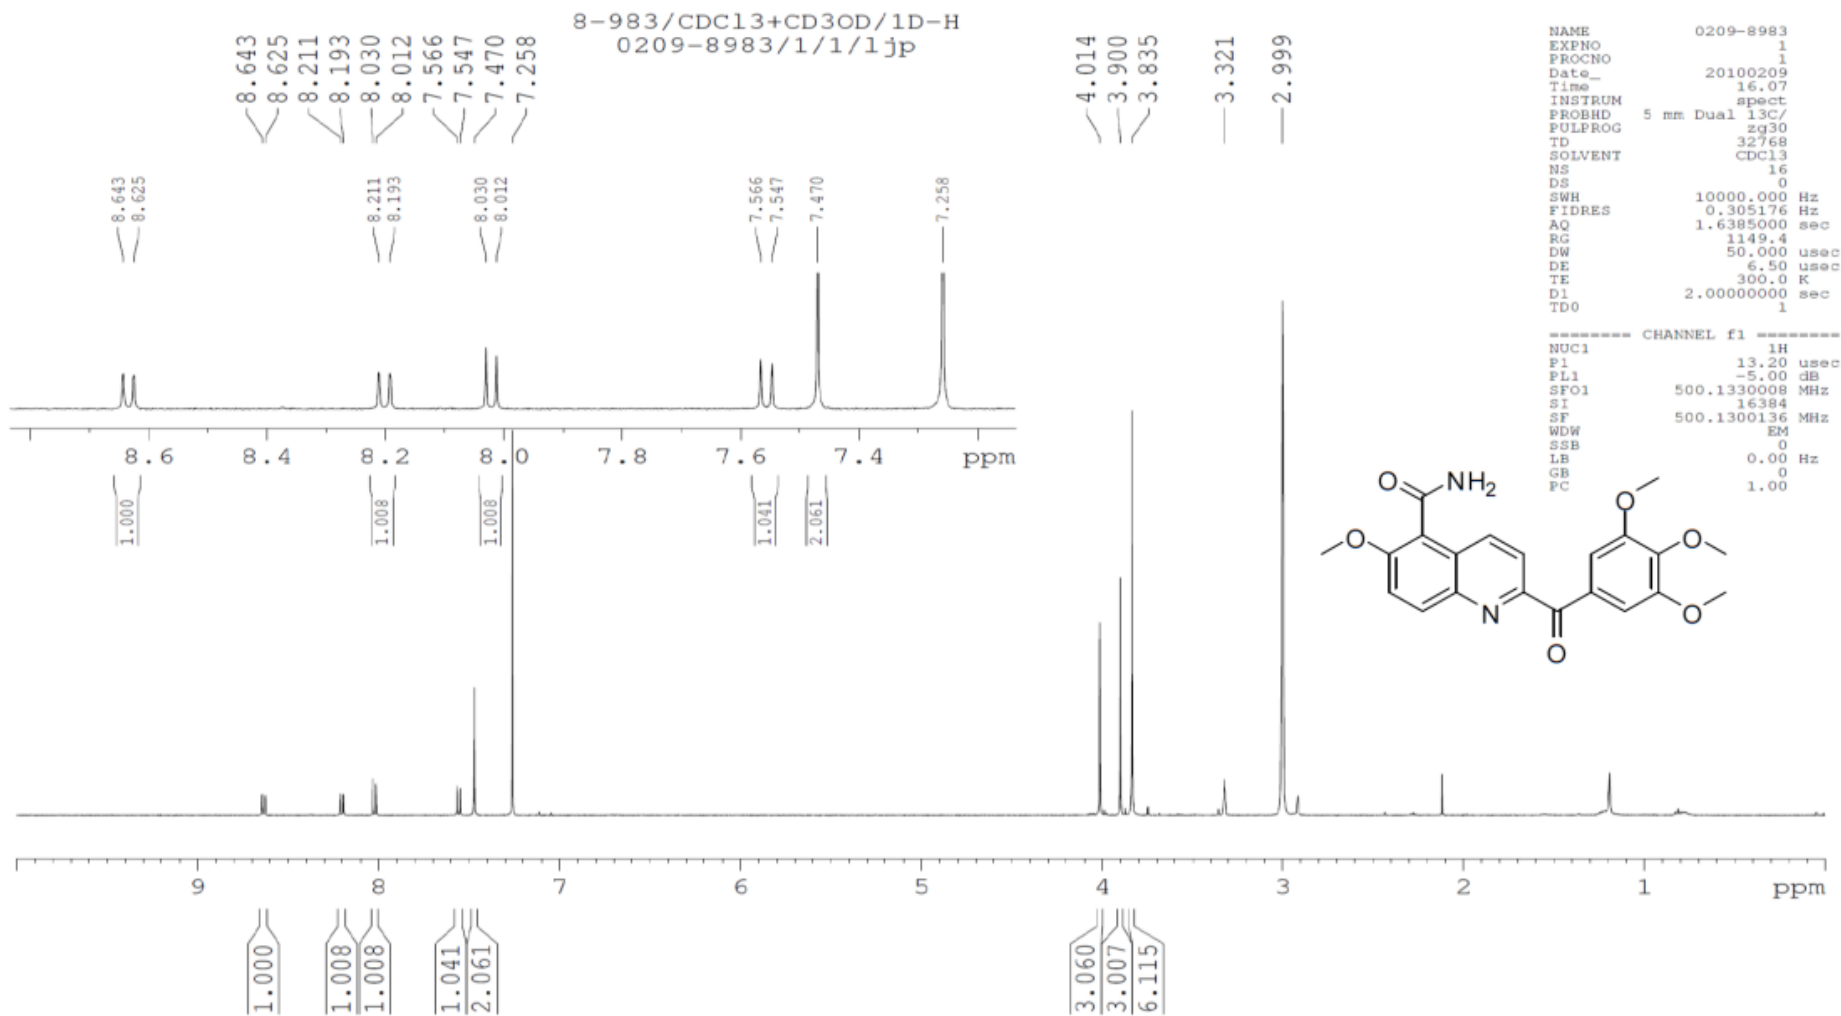



### <sup>1</sup>H Spectra for compound 9

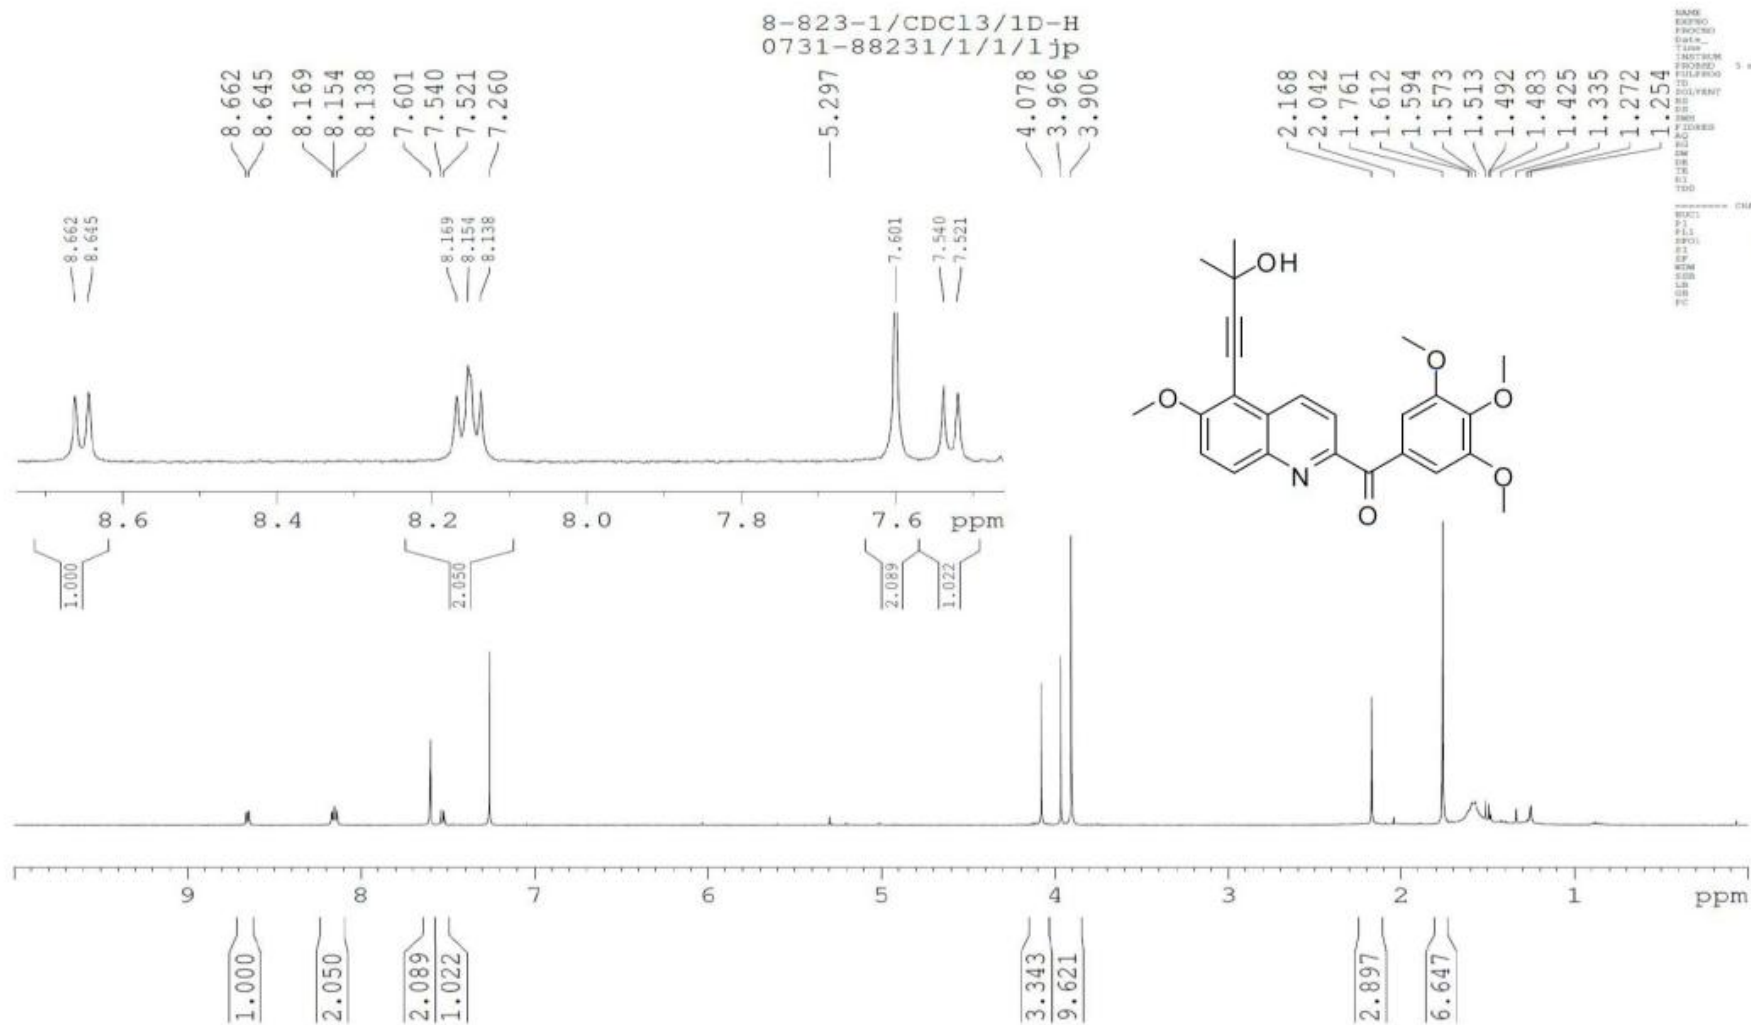

<sup>1</sup>H Spectra for compound 10

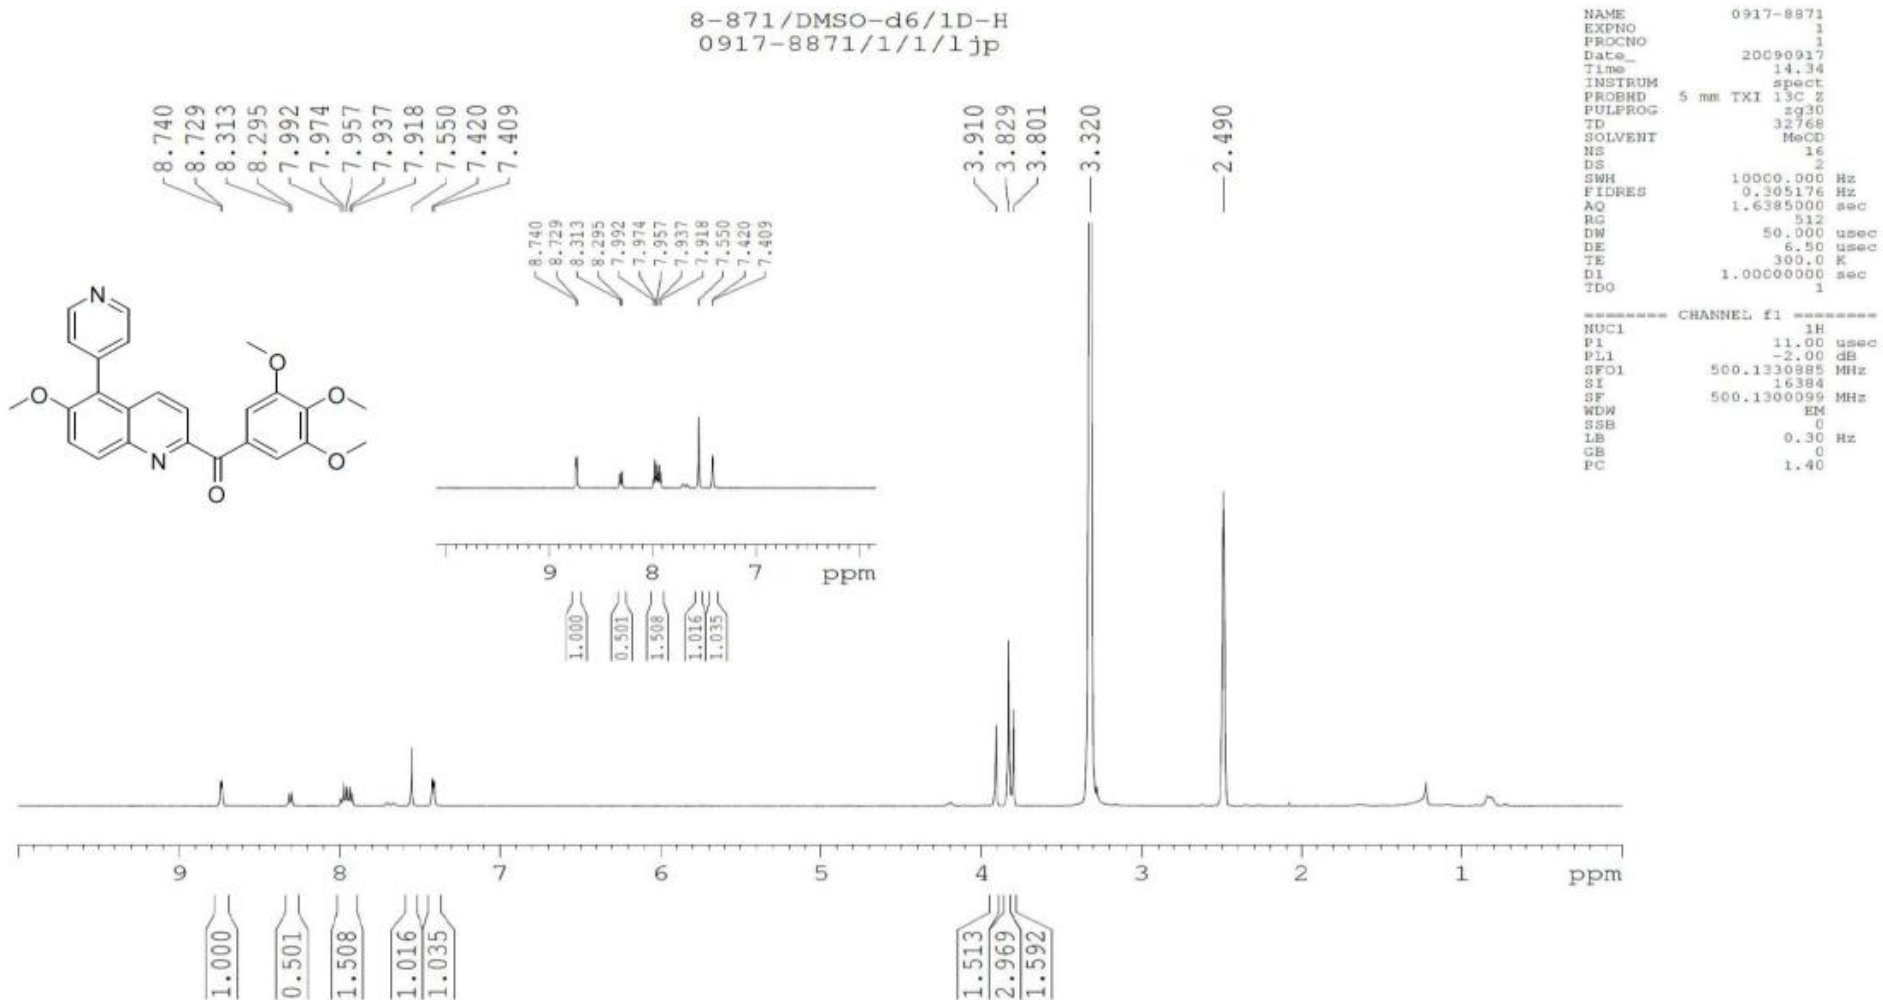

<sup>1</sup>H Spectra for compound 11

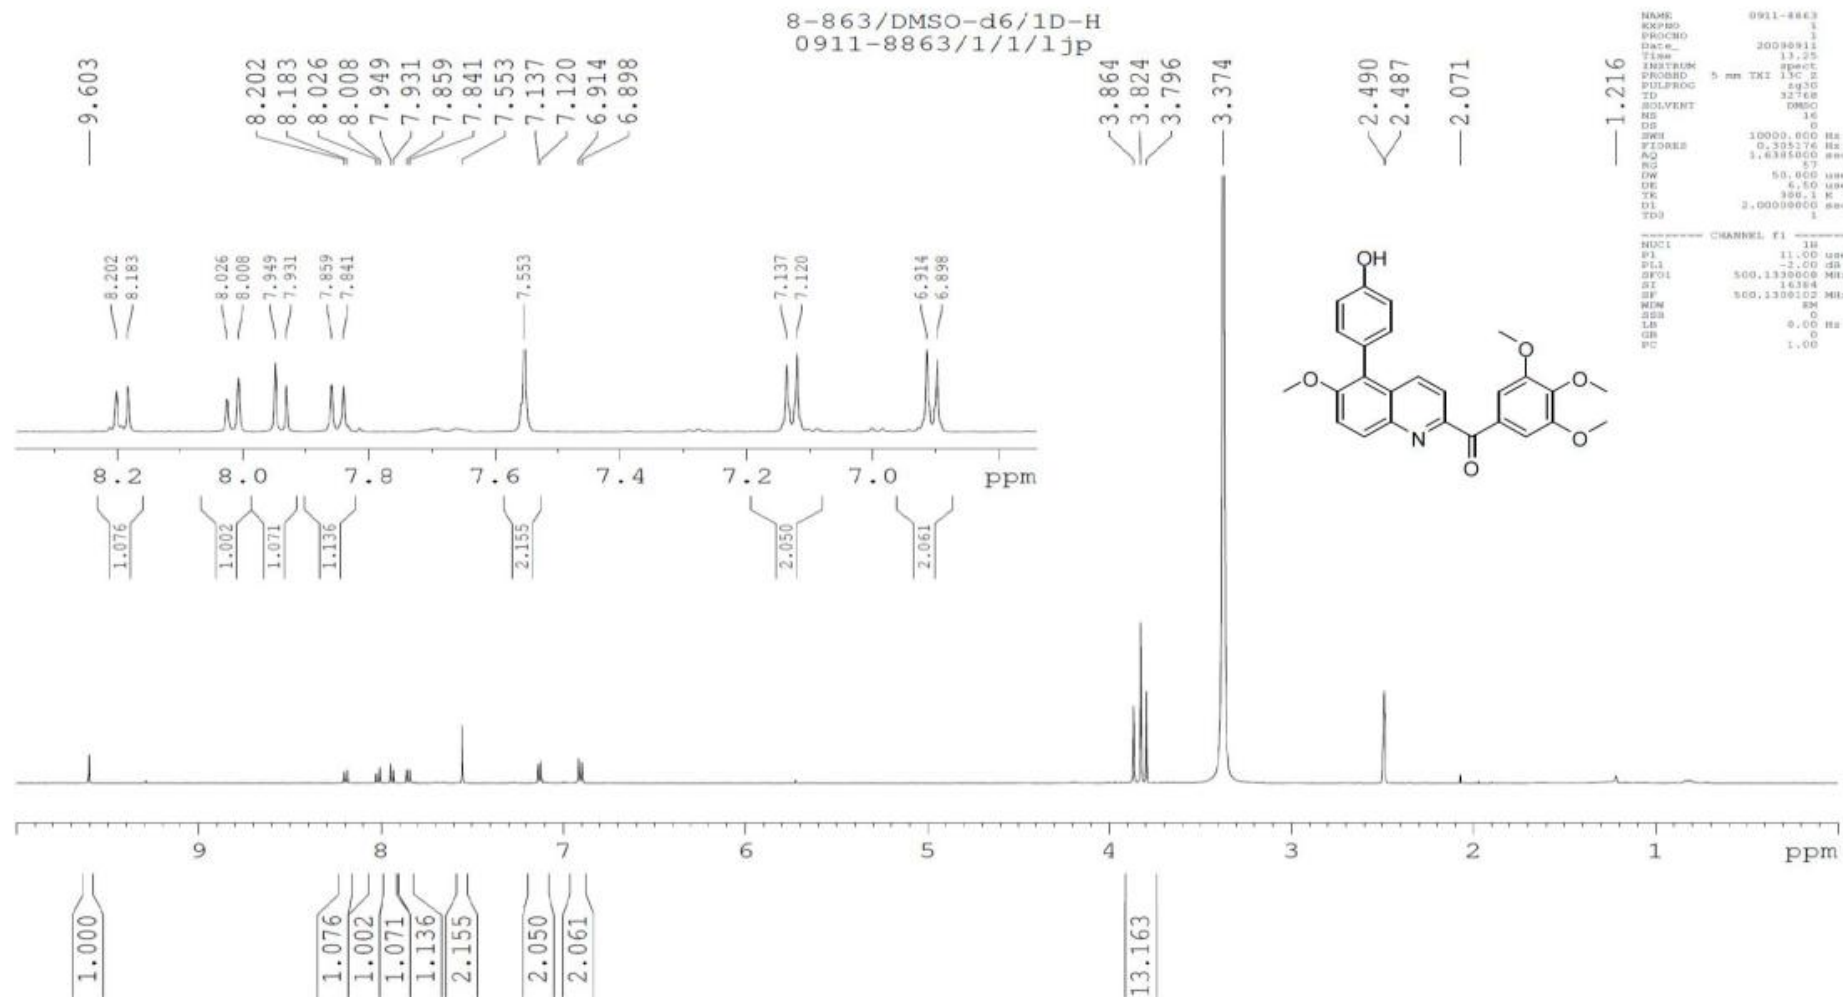

### <sup>1</sup>H Spectra for compound 12

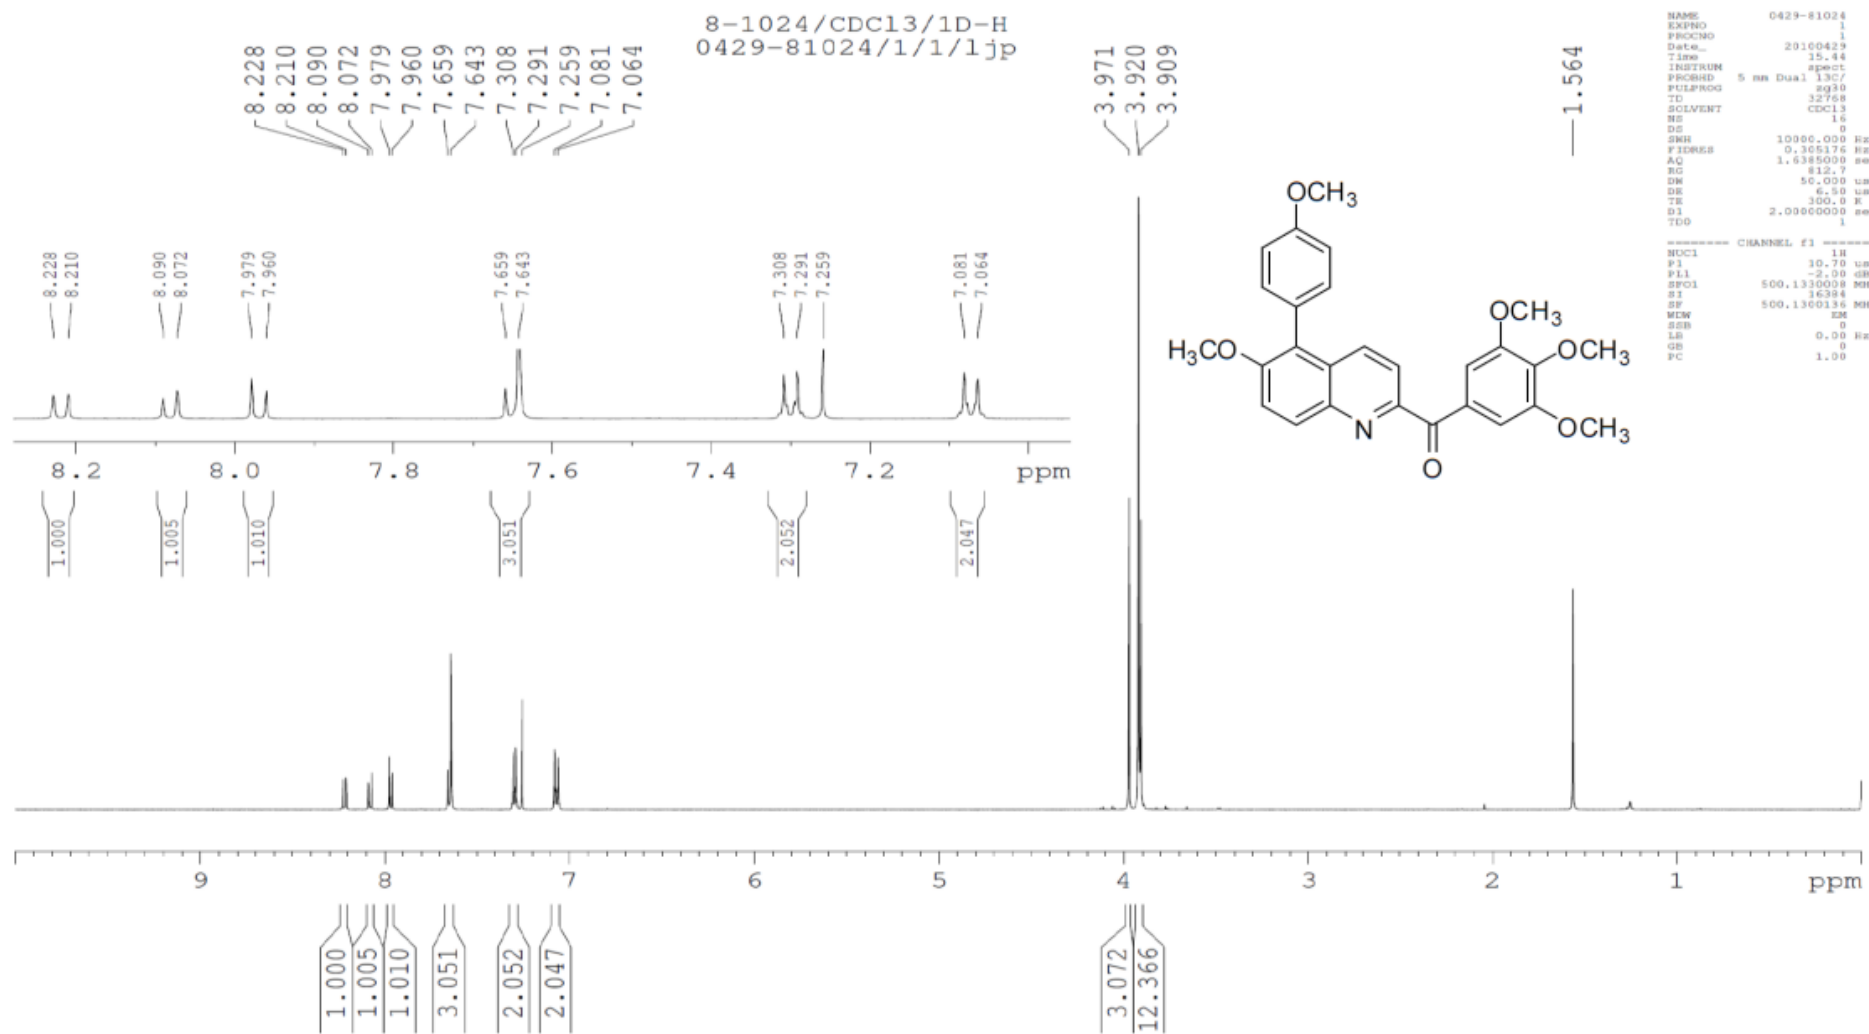

### <sup>1</sup>H Spectra for compound 13

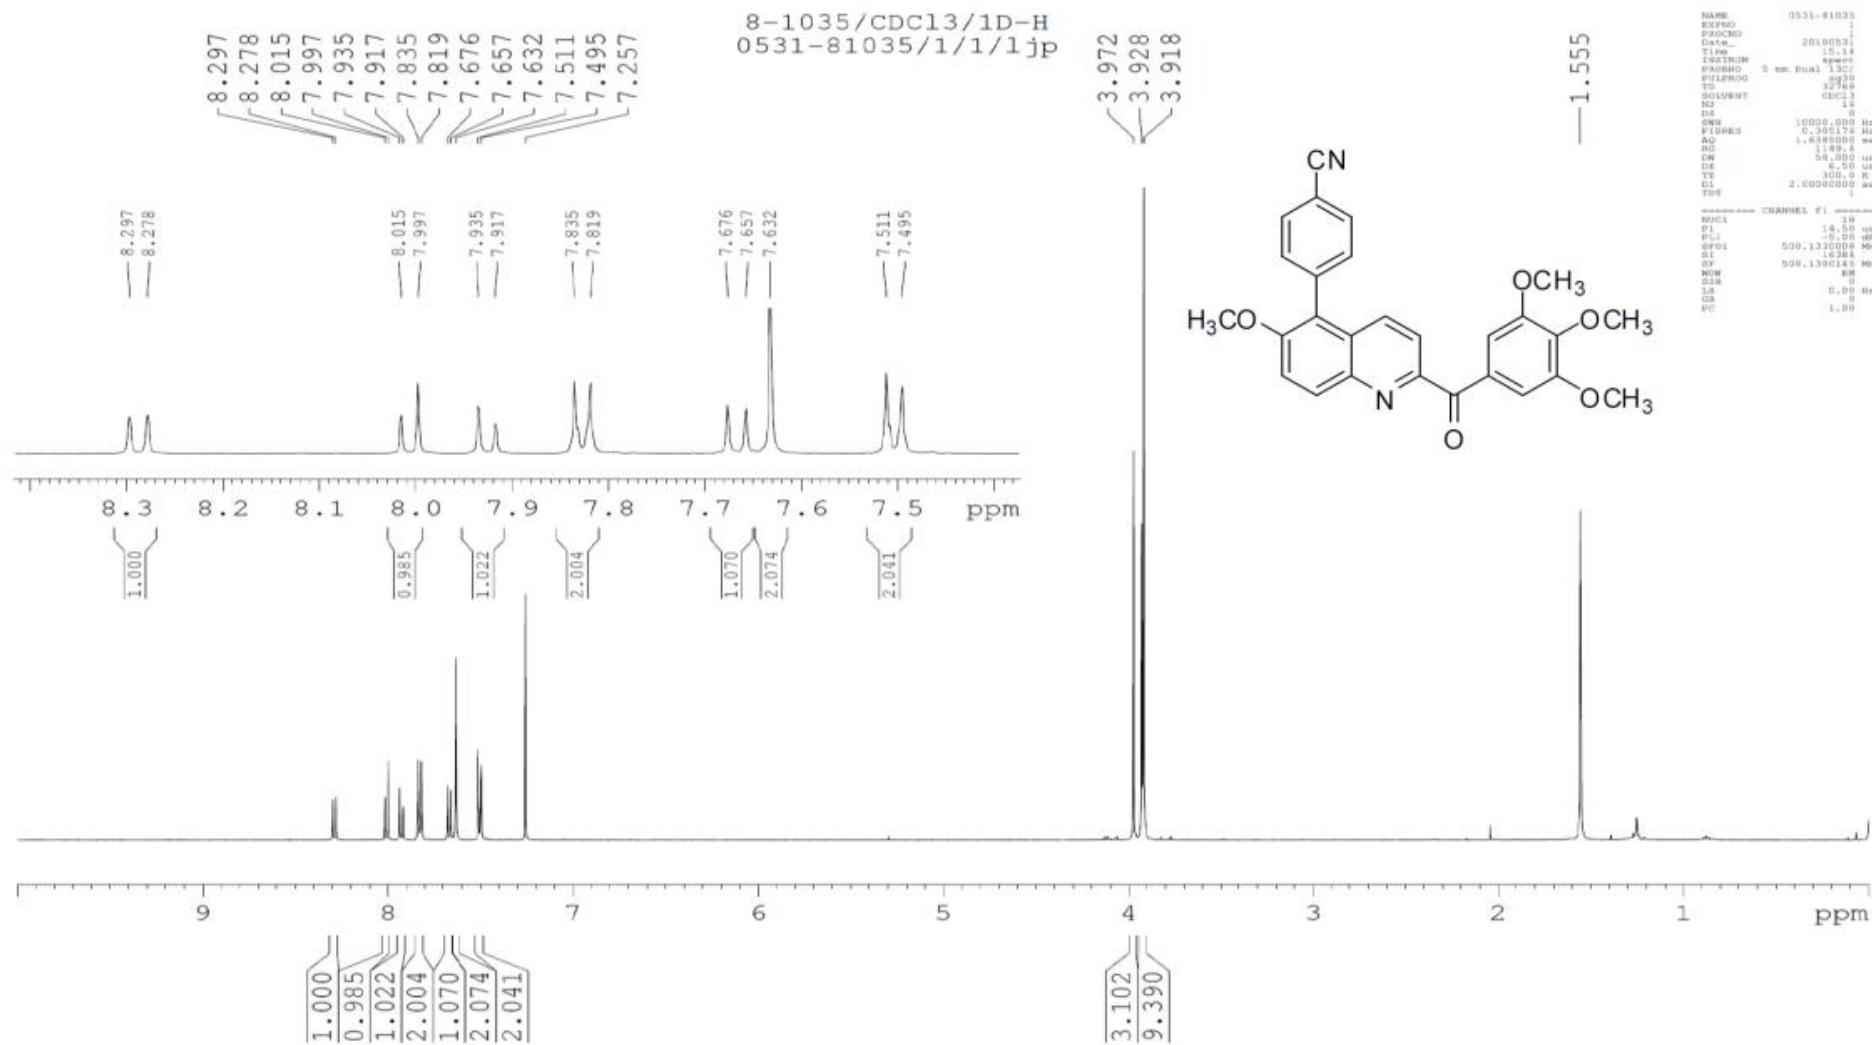

### <sup>1</sup>H Spectra for compound 14

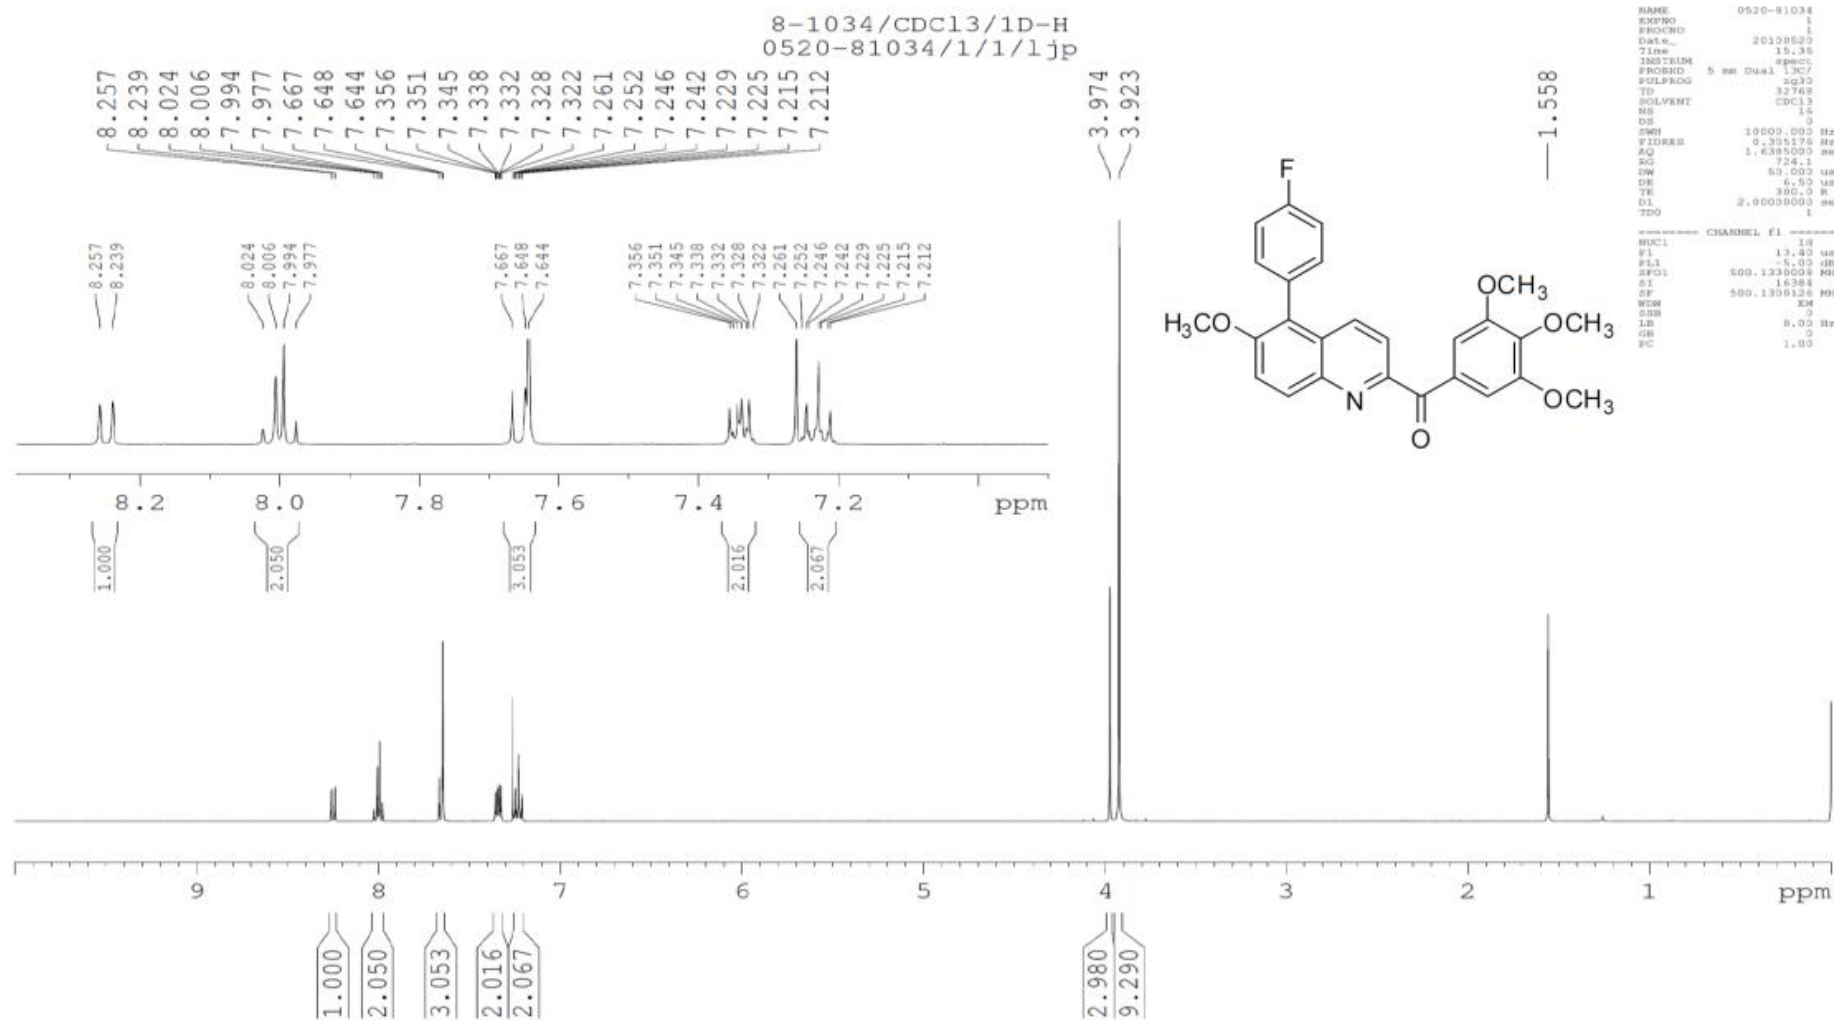

<sup>1</sup>H Spectra for compound 15

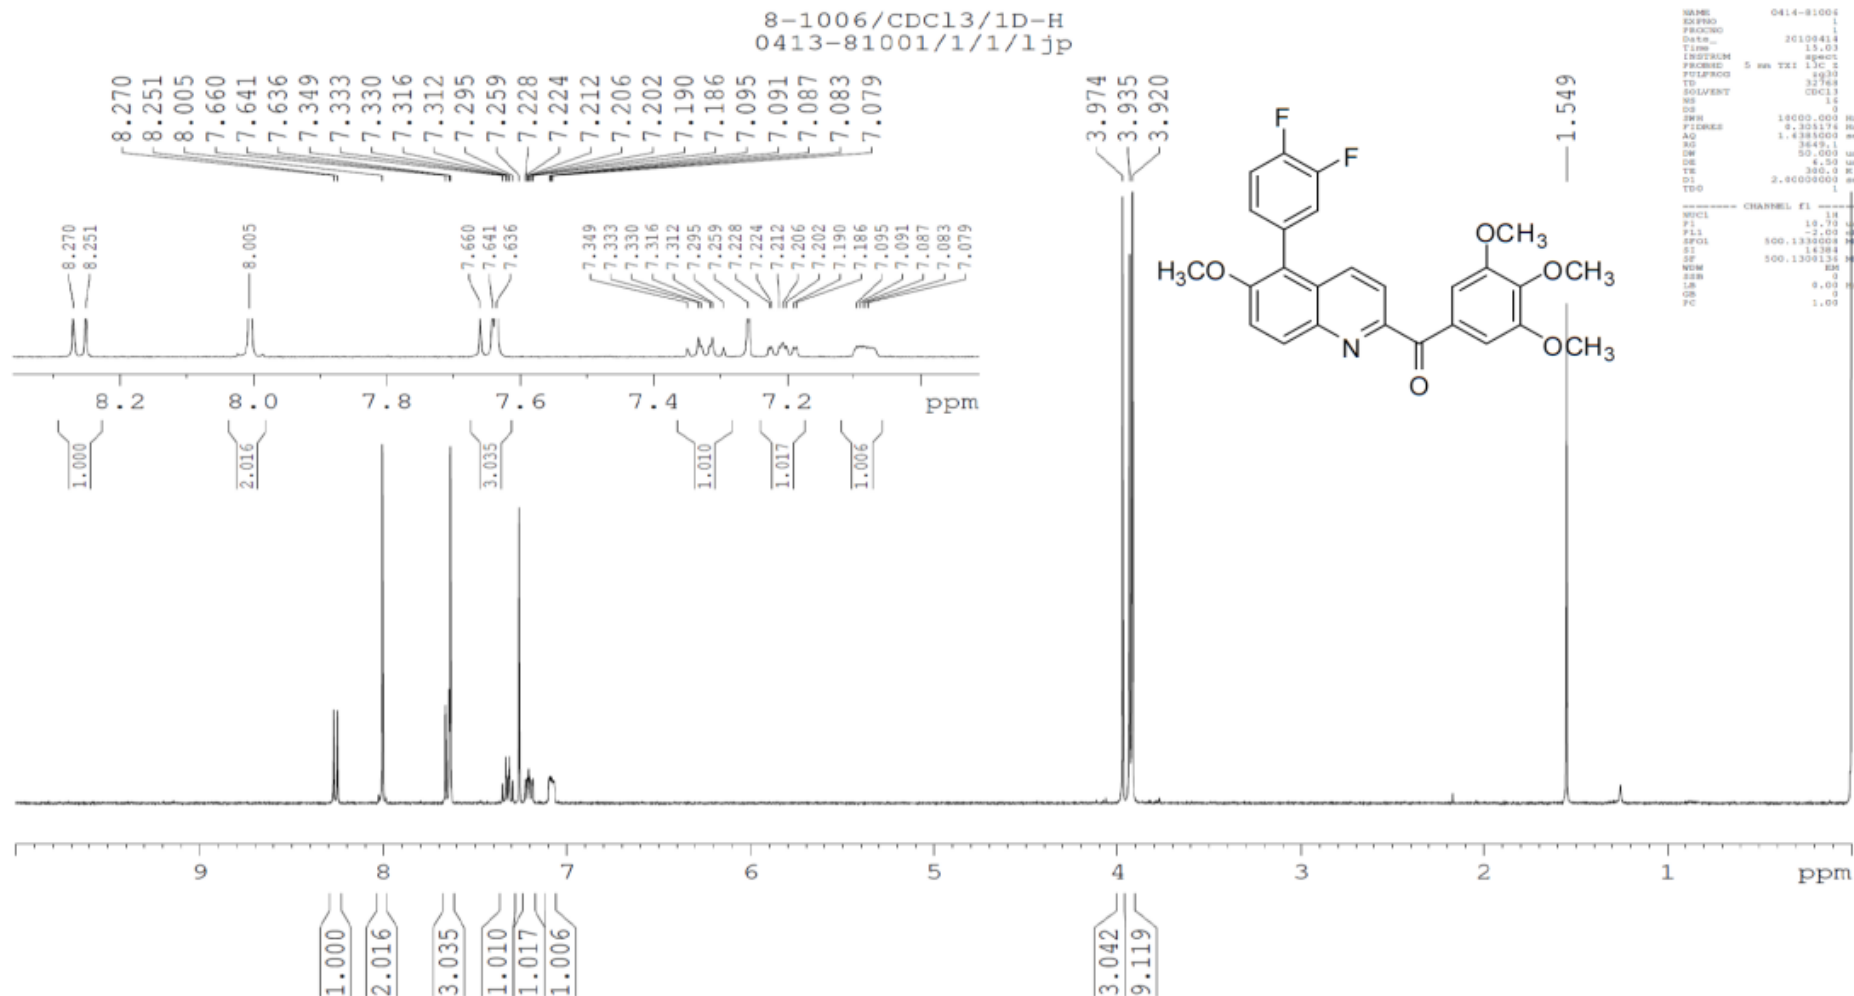

<sup>1</sup>H Spectra for compound 16

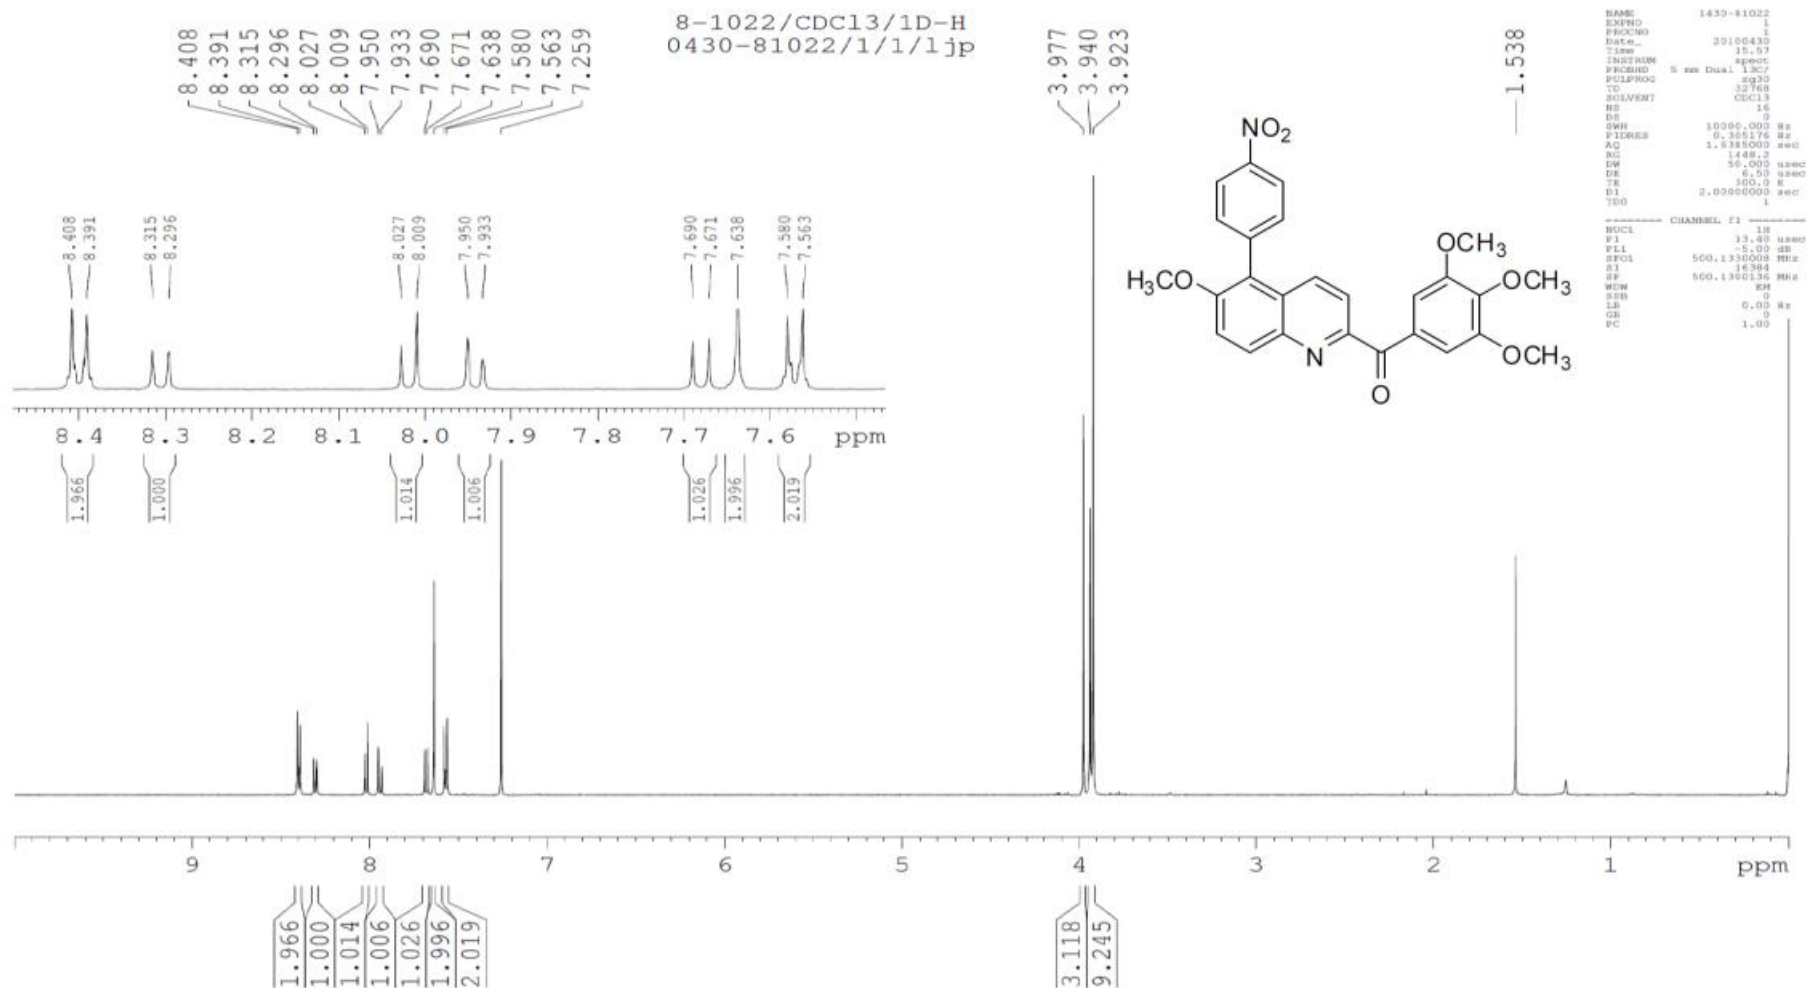



### <sup>13</sup>C Spectra for compound 6

1008-8-723/CDC13/C13  
1008-8-723/1/1/1jp

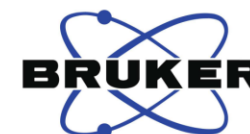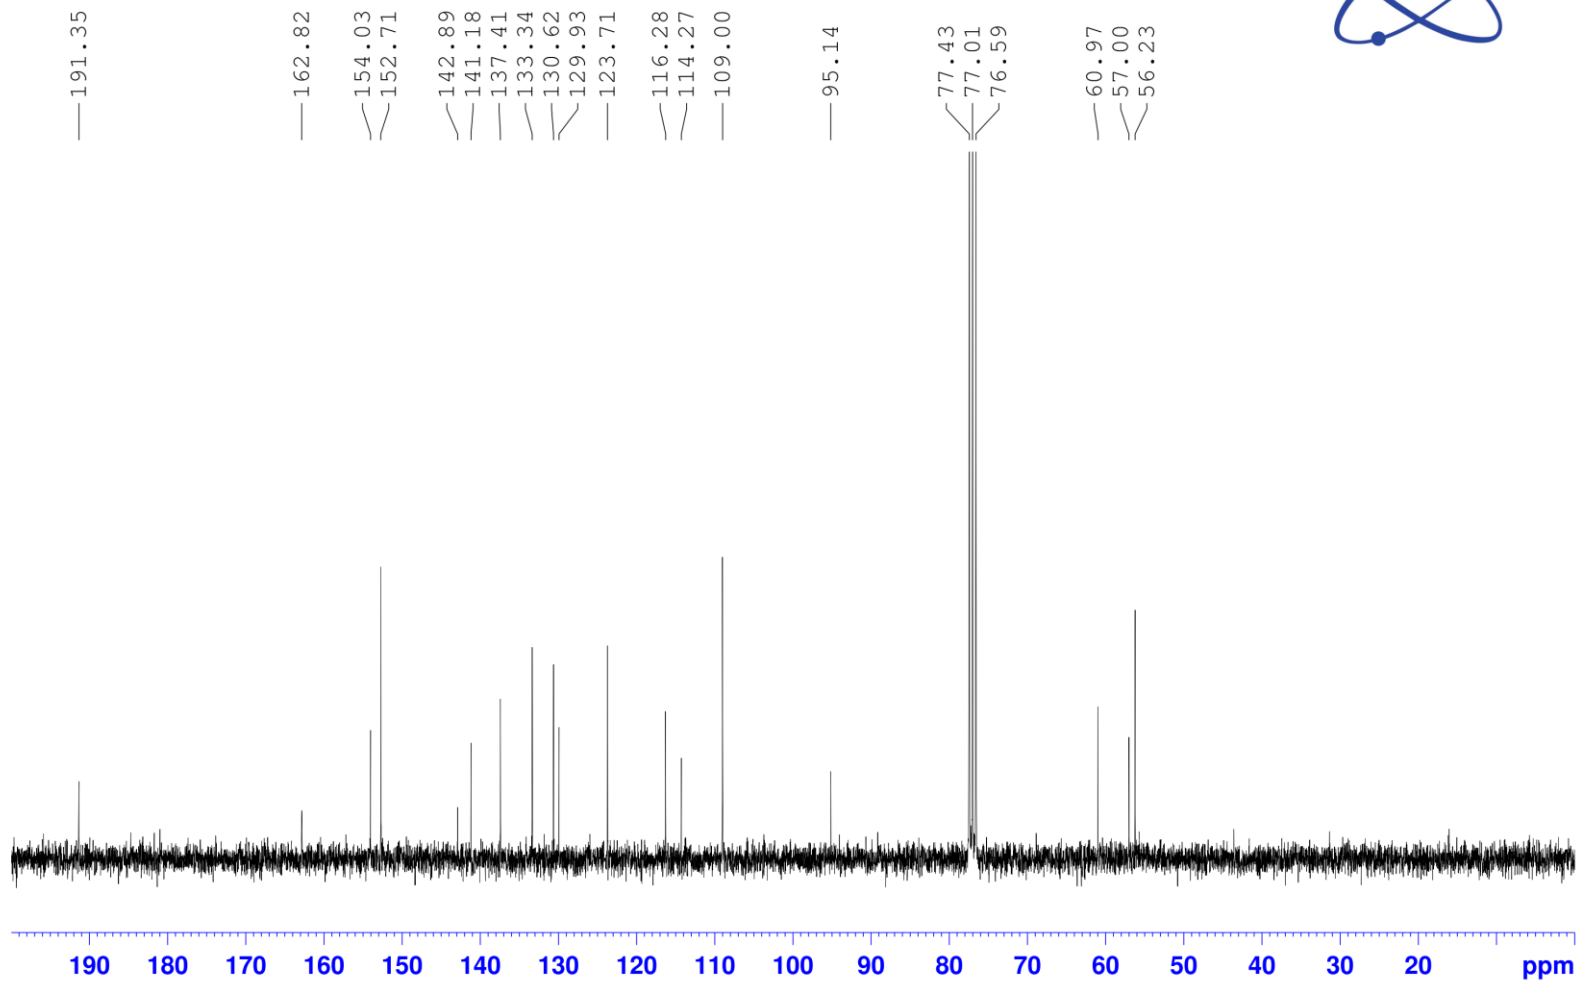

### <sup>13</sup>C Spectra for compound 7

1008-8-996-2/CDC13/C13  
1008-8-996-2/1/1/1jp

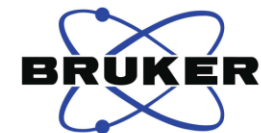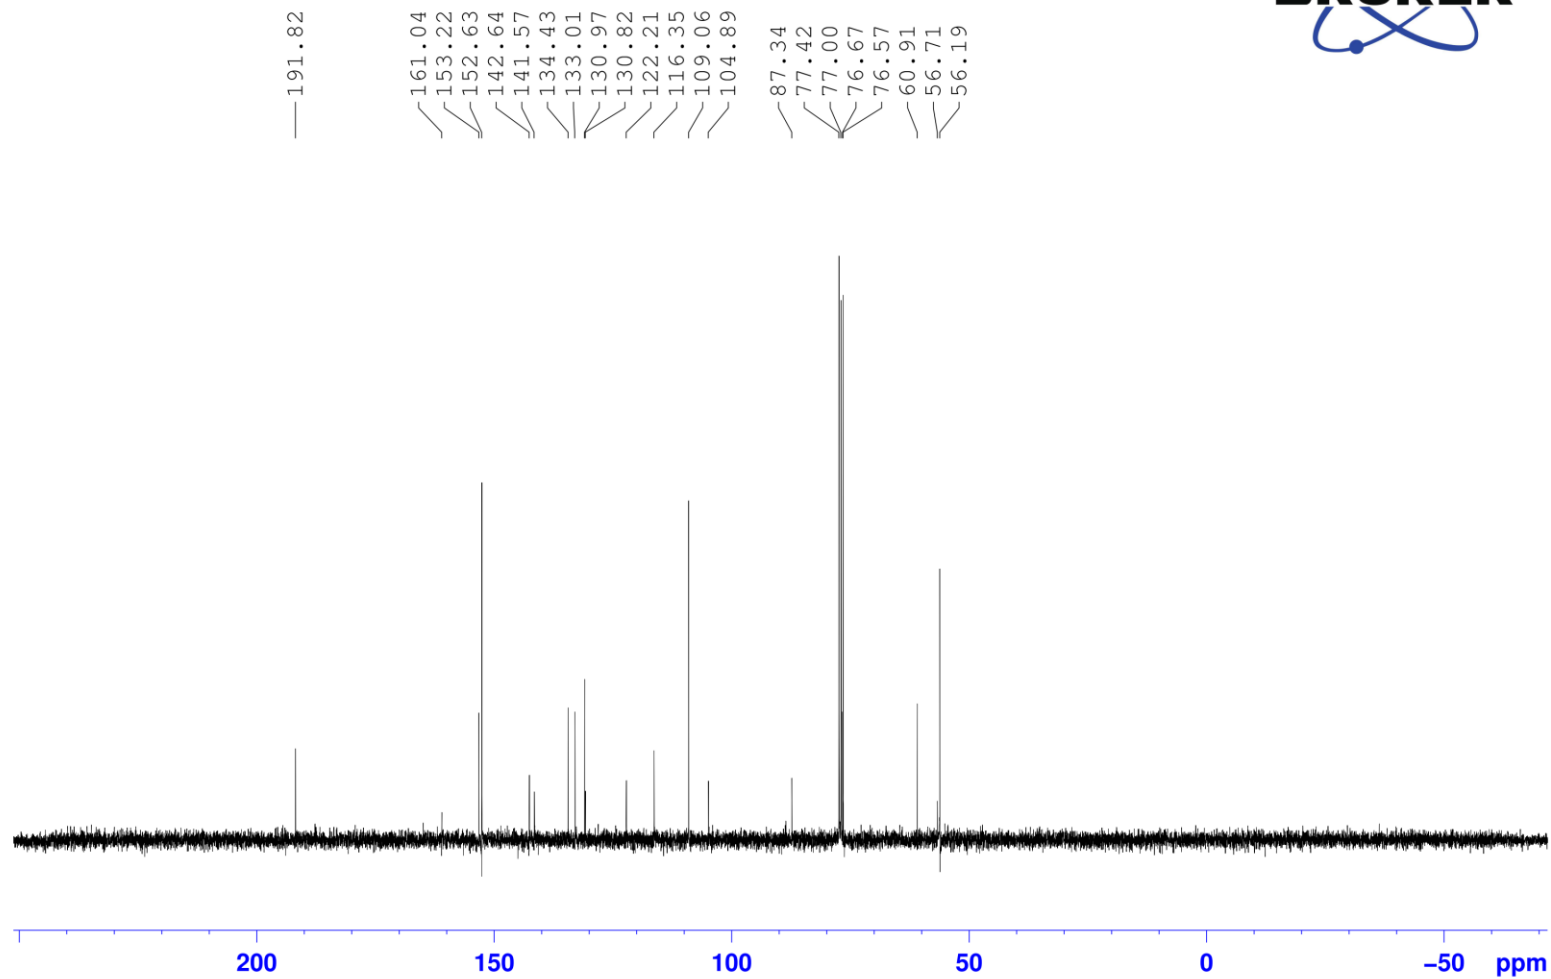

### <sup>13</sup>C Spectra for compound 8

1008-8-996-2/CDC13/C13  
1008-8-996-2/1/1/1.jp



### <sup>13</sup>C Spectra for compound 9

1008-8-823-1/CDC13/C13  
1008-8-823-1/1/1/1.jp

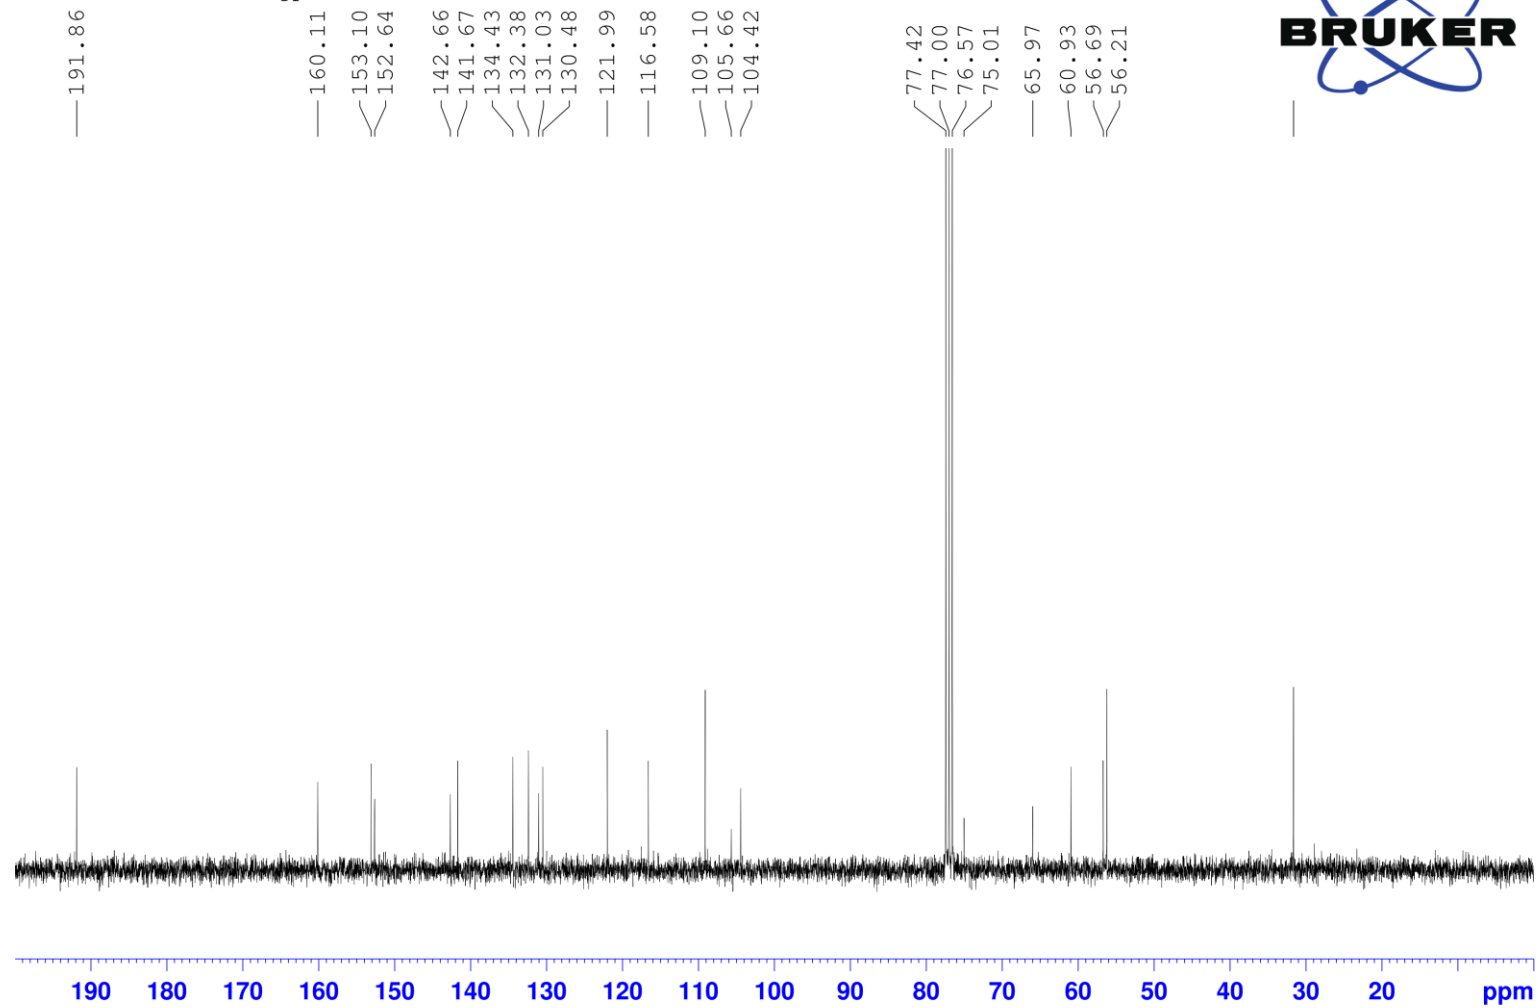

### <sup>13</sup>C Spectra for compound 10

1008-8-871/CDC13/C13  
1008-8-871/1/1/1.jp

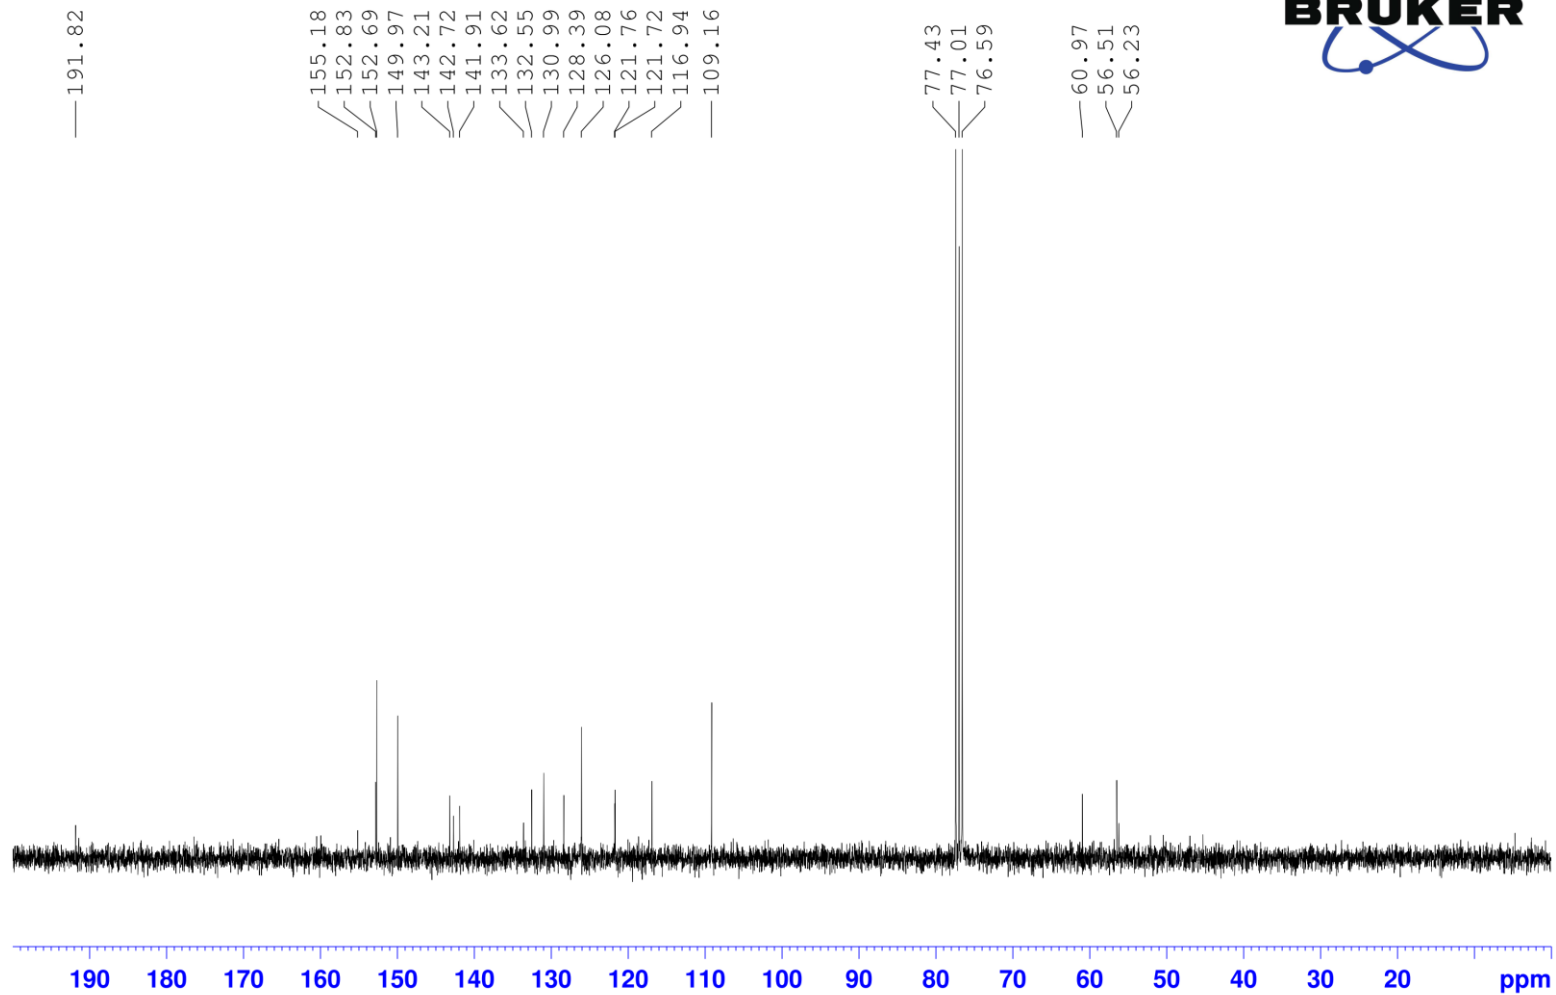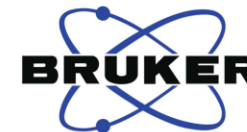

### <sup>13</sup>C Spectra for compound 11

1008-8-863/CDC13/C13  
1008-8-863/1/1/1.jp

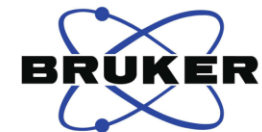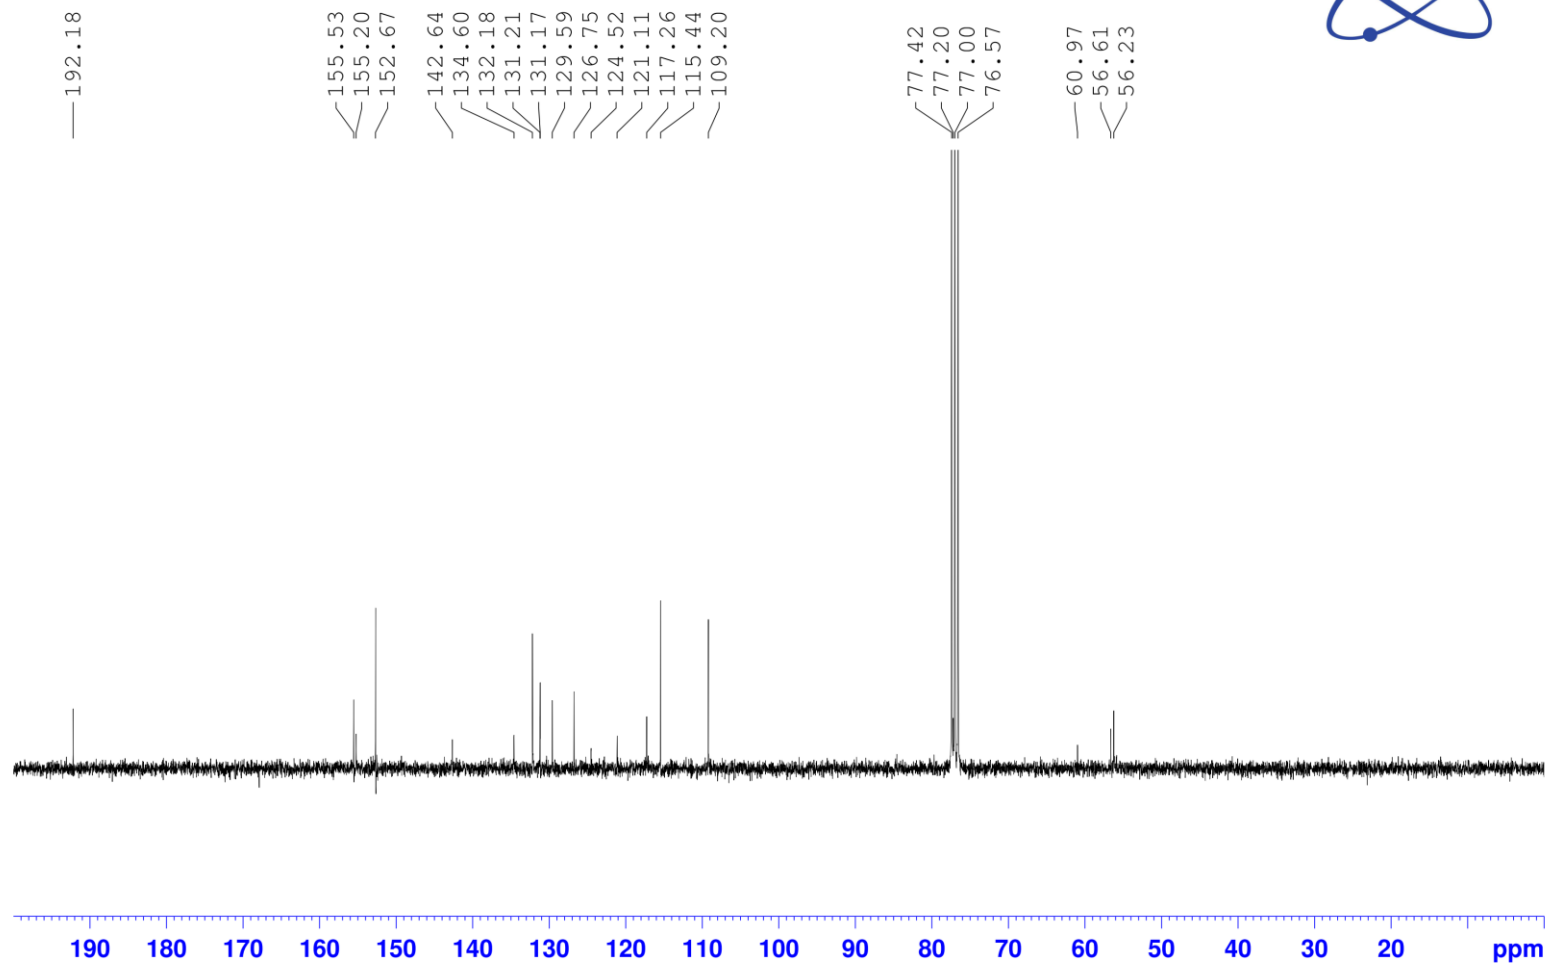

### <sup>13</sup>C Spectra for compound 12

1008-8-1024/CDC13/C13  
1008-8-1024/1/1/1.jp

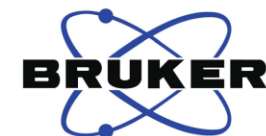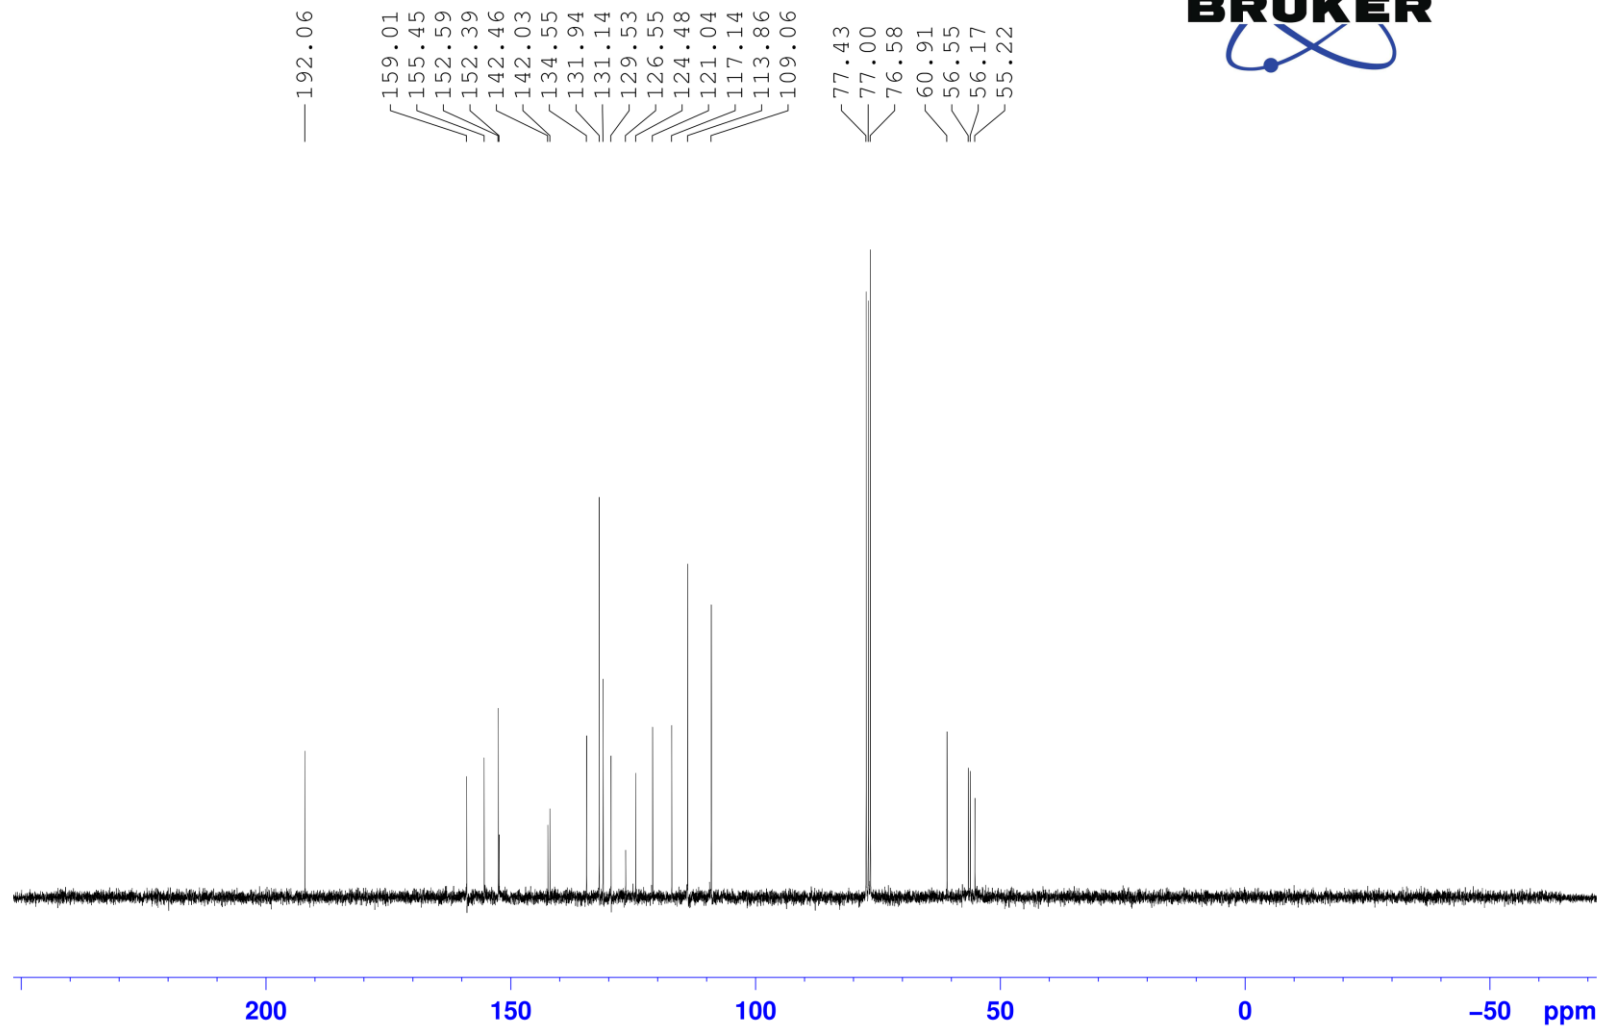

### <sup>13</sup>C Spectra for compound 13

1008-8-1035/CDC13/C13  
1008-8-1035/1/1/1.jp

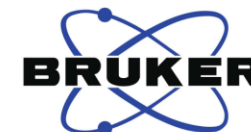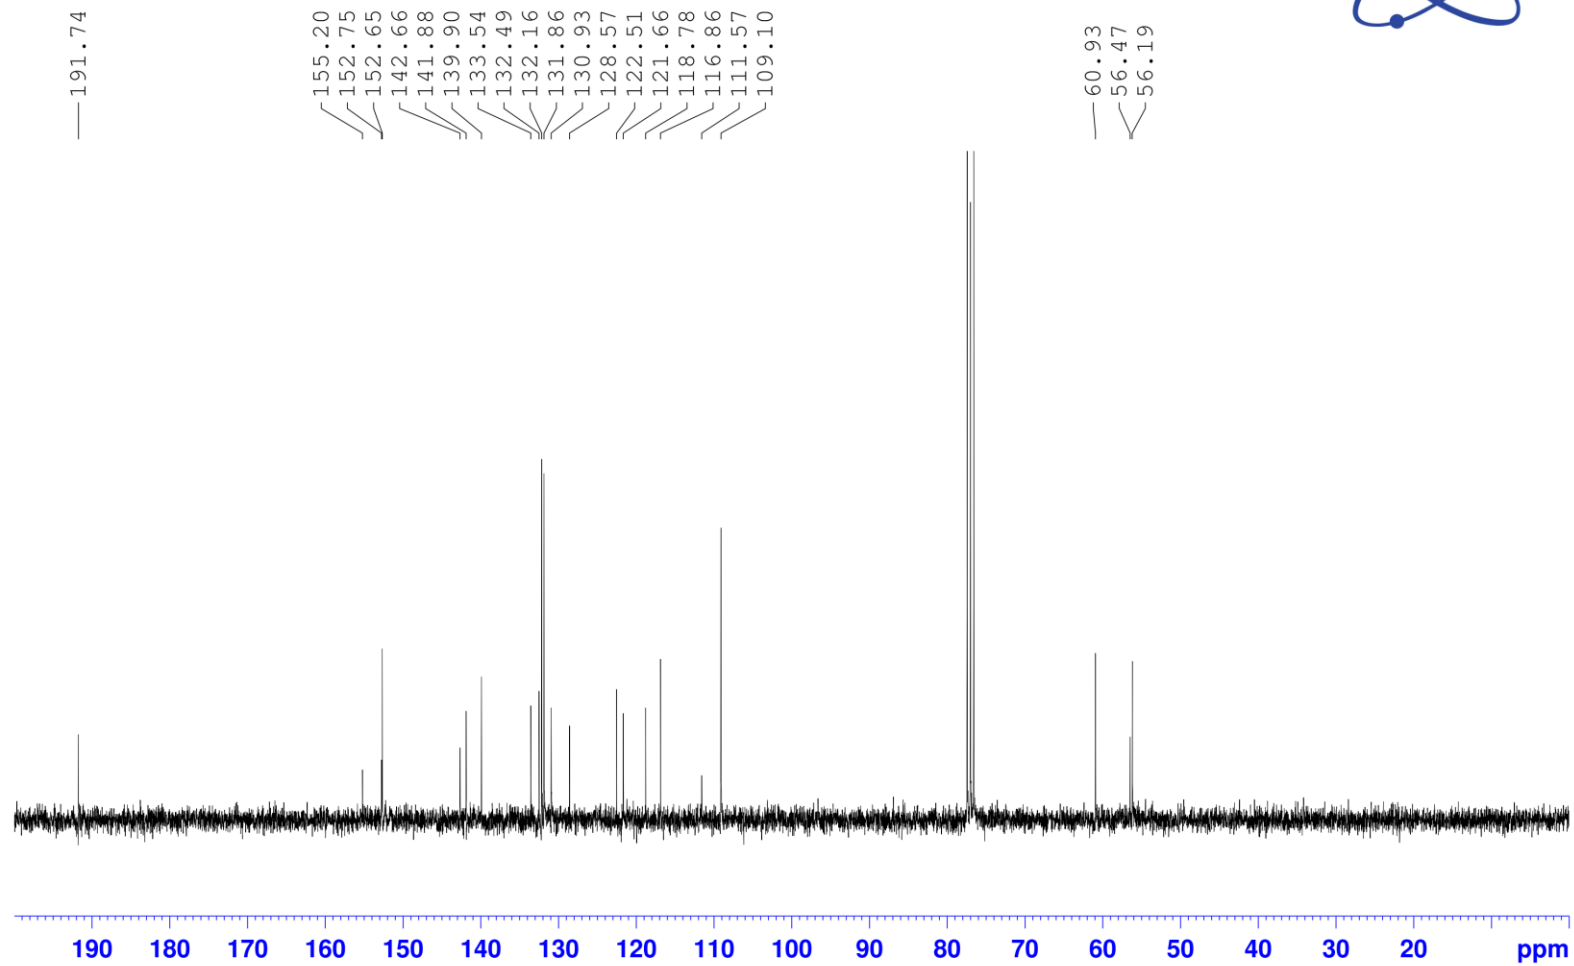



### <sup>13</sup>C Spectra for compound 14

1008-8-1034/CDC13/C13  
1008-8-1034/1/1/1.jp

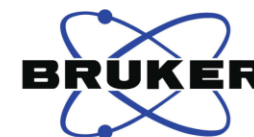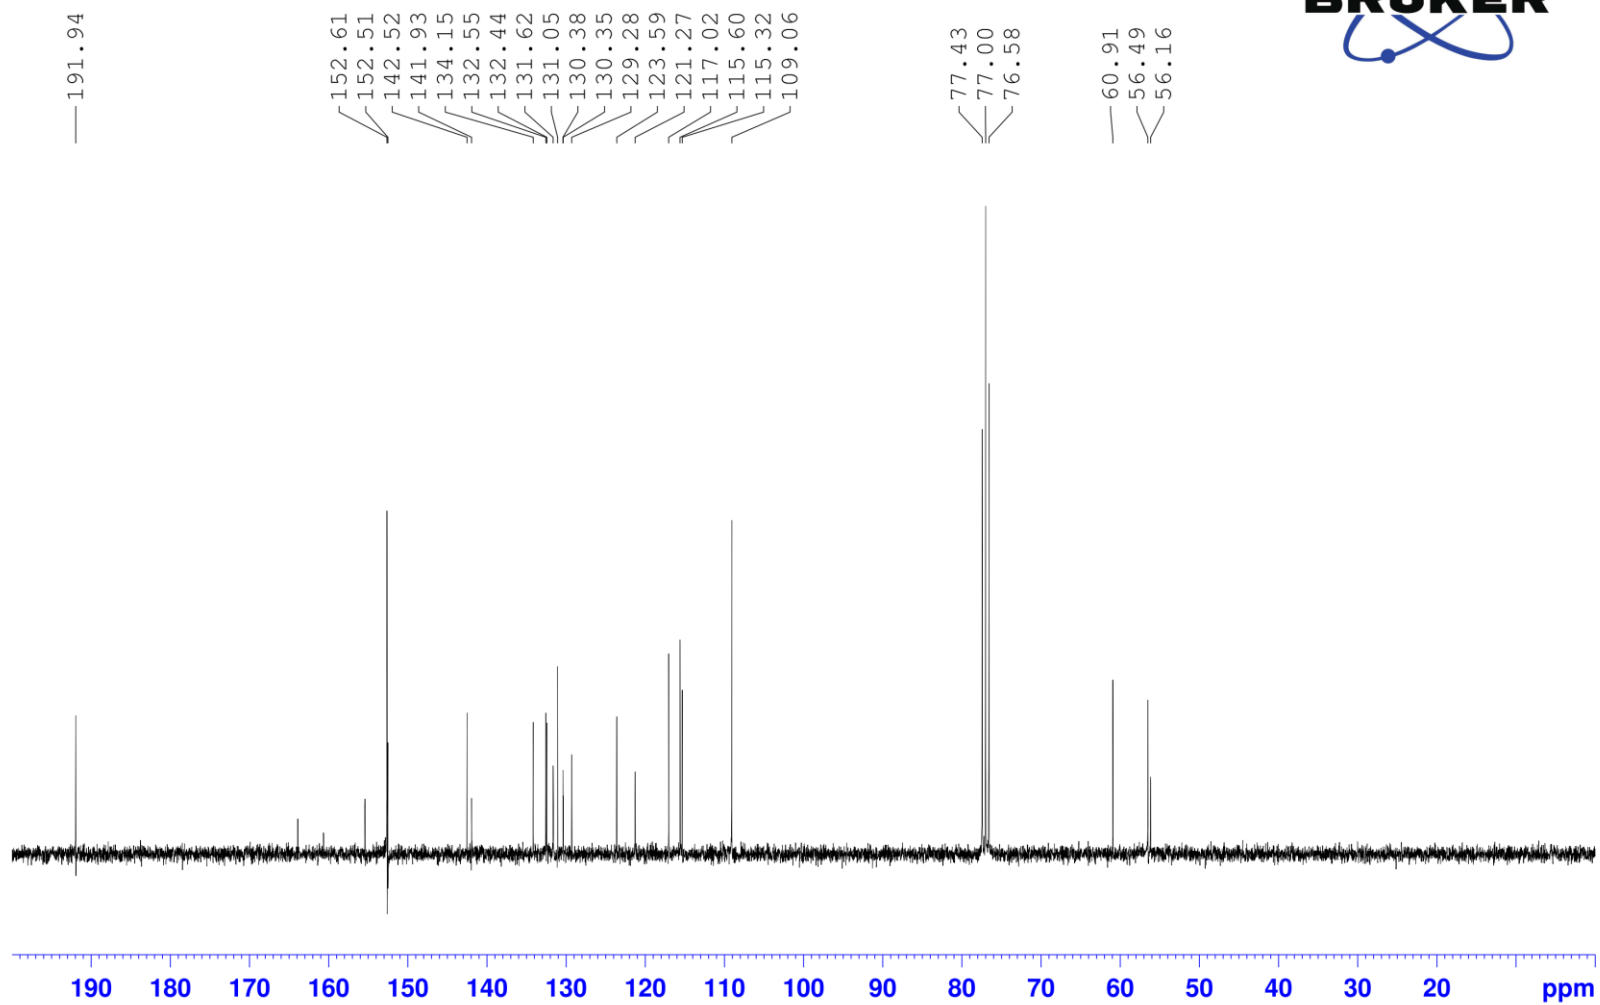

### <sup>13</sup>C Spectra for compound 15

1008-8-1006/CDC13/C13  
1008-8-1006/1/1/1.jp

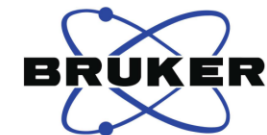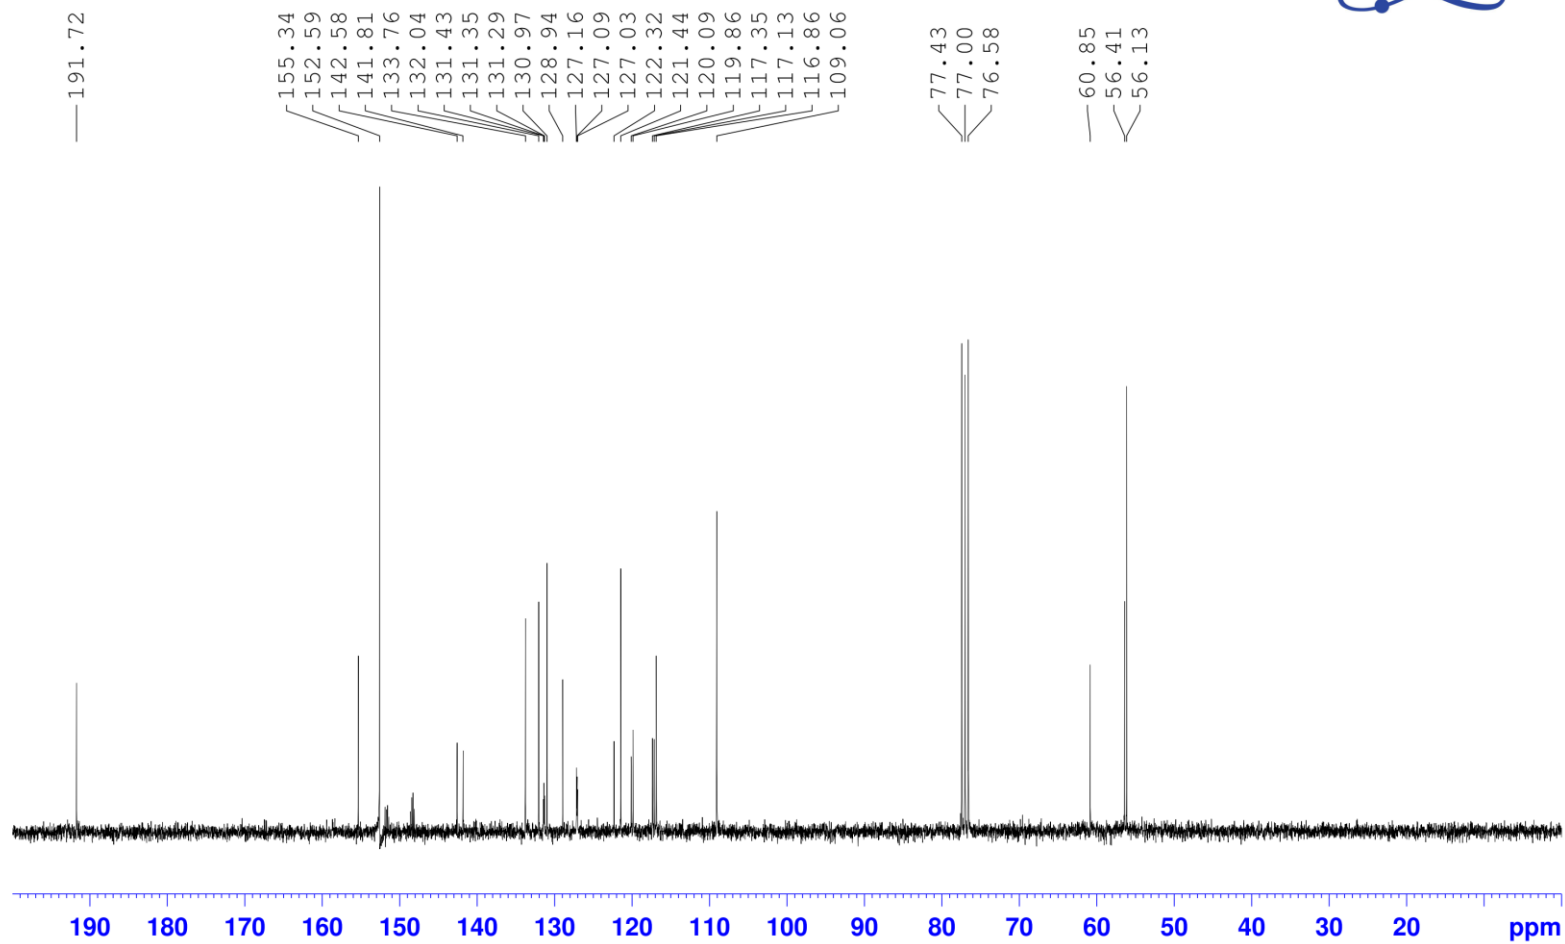

### <sup>13</sup>C Spectra for compound 16

1008-8-1022/CDC13/C13  
1008-8-1022/1/1/1.jp

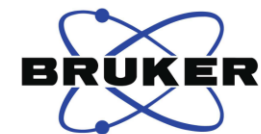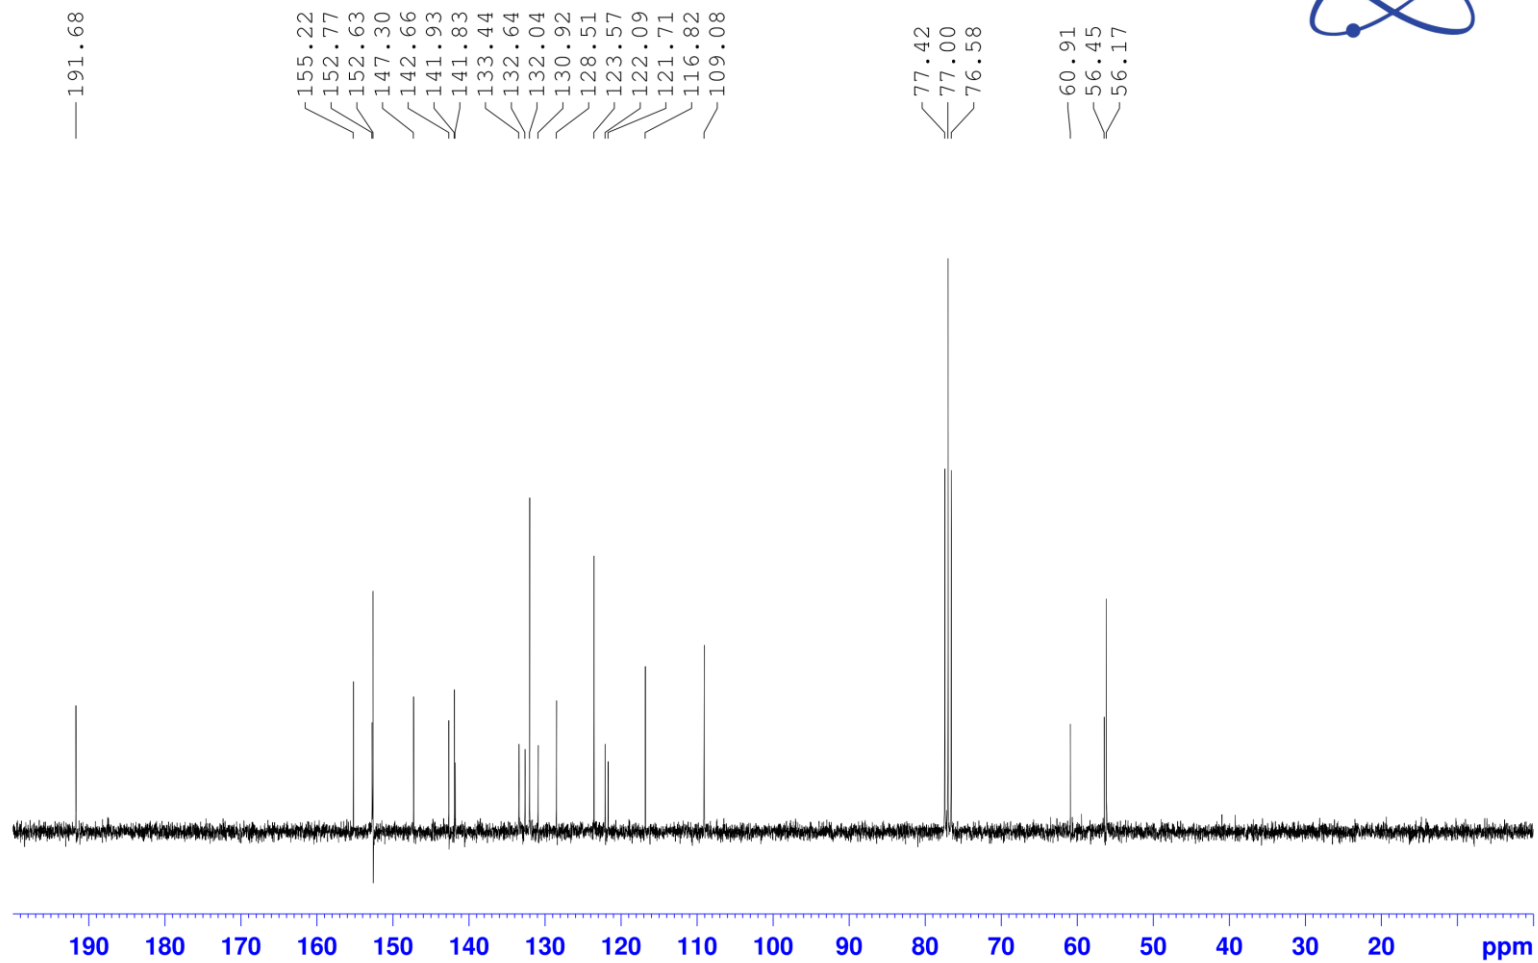

### IR Spectra for compound 6

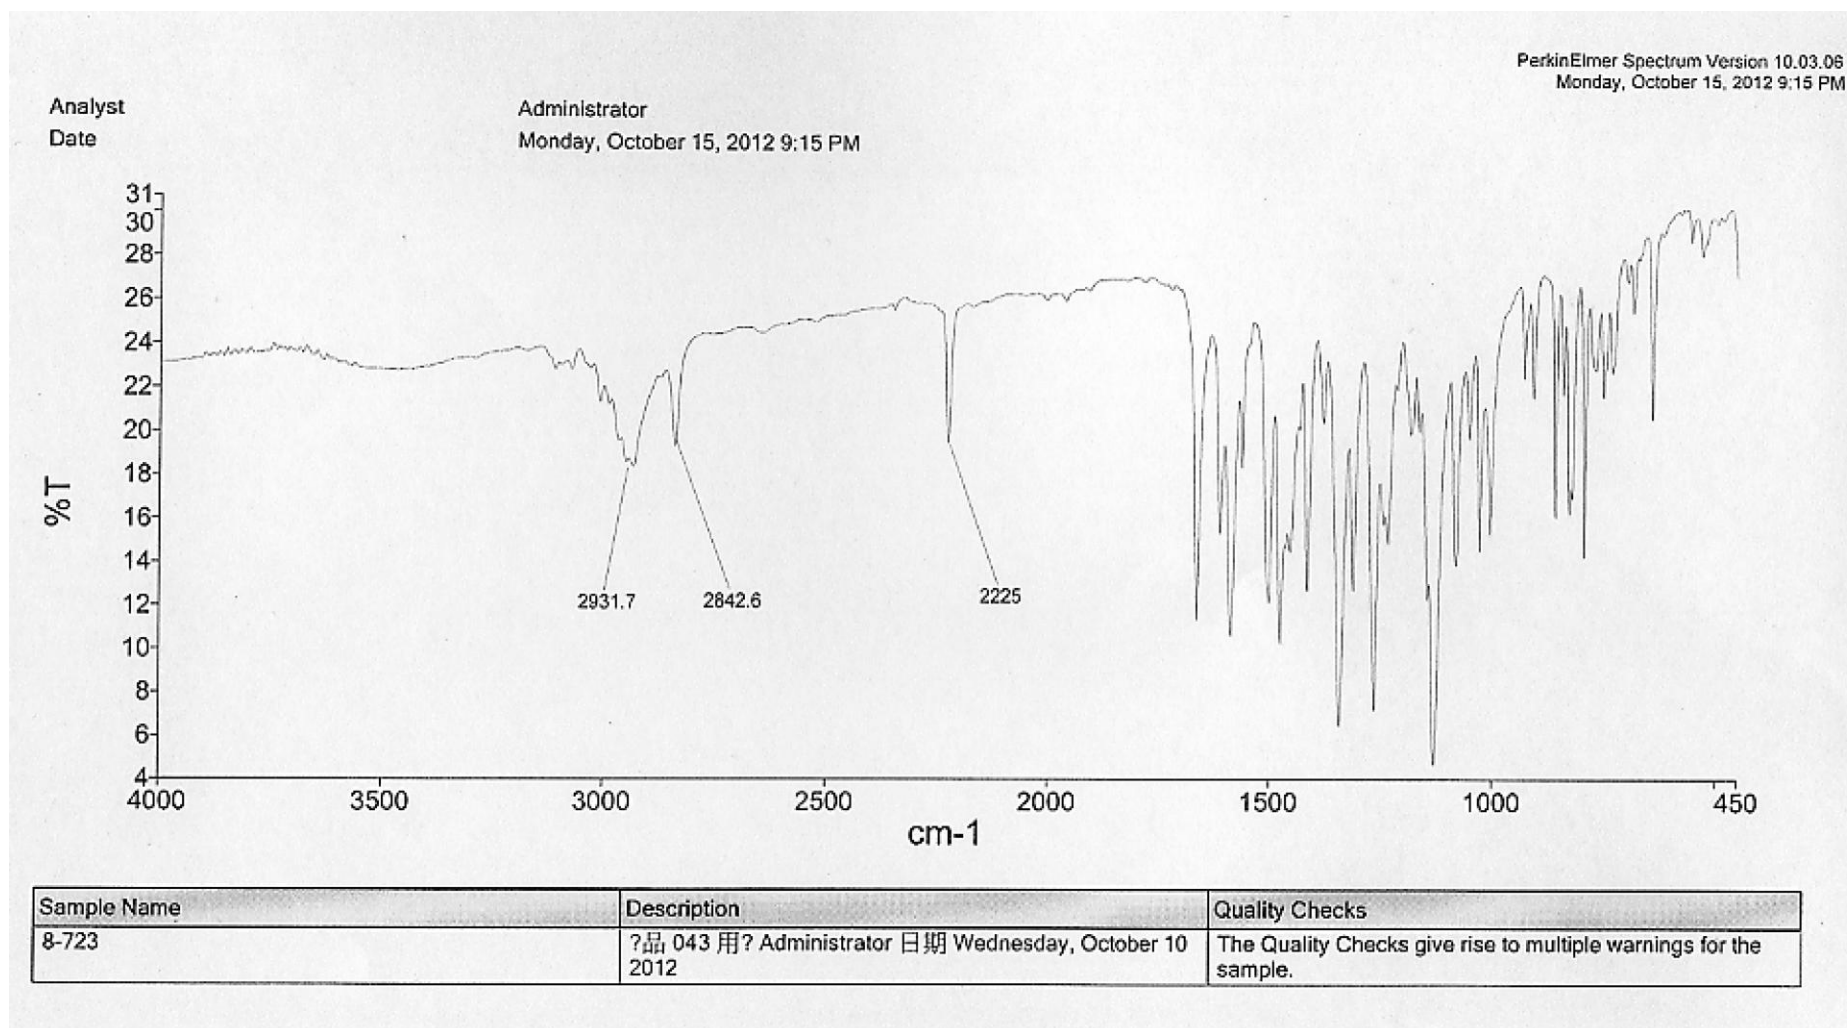

### IR Spectra for compound 7

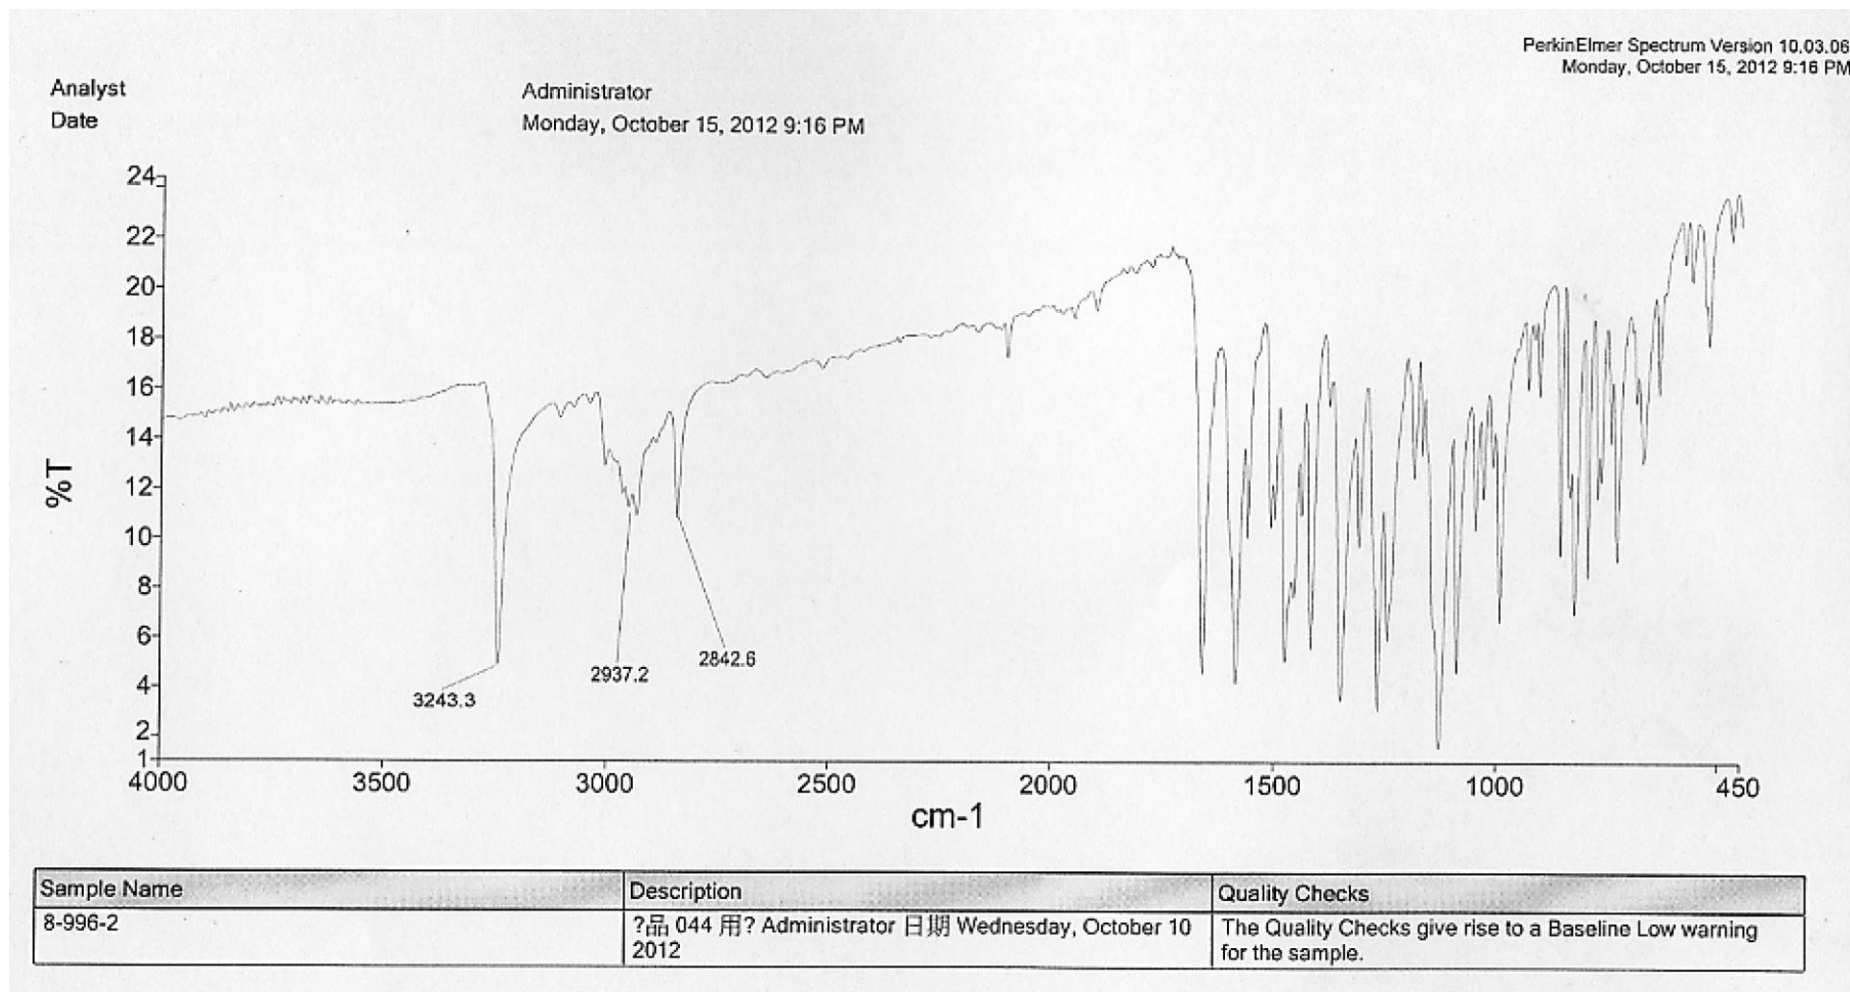

Supplement: c2ob26614h.pdf [file c2ob26614h.pdf]
